# Supplementary material
Source: Copernicus journal article supplement (doi:10.5194/egusphere-2026-3042)
Supplement: Supplementary file [file Polythermal Conditions in Small Glaciers in the Swiss Alps_MG Annotated.pdf › Polythermal Conditions in Small Glaciers in the Swiss Alps_MG Annotated.pdf]

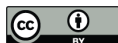

## Polythermal conditions in small glaciers in the Swiss Alps

Janosch Beer<sup>1,2</sup>, Mylène Jacquemart<sup>1,2</sup>, Matthias Huss<sup>1,2,6</sup>, Ilaria Santin<sup>1,2</sup>, Gabriela Clara Racz<sup>3</sup>,  
Christophe Ogier<sup>1,2</sup>, Saskia Gindraux<sup>4</sup>, Leo Hösli<sup>1,2</sup>, Raphael Moser<sup>1,2</sup>, James Irving<sup>3</sup>, Mauro Fischer<sup>5,7</sup>,  
and Daniel Farinotti<sup>1,2</sup>

<sup>1</sup>Laboratory of Hydraulics, Hydrology and Glaciology (VAW), ETH Zurich, Zurich, Switzerland

<sup>2</sup>Swiss Federal Institute for Forest, Snow and Landscape Research (WSL), bâtiment ALPOLE, Sion, Switzerland

<sup>3</sup>University of Lausanne, Institute of Earth Sciences, Lausanne, Switzerland

<sup>4</sup>Centre de recherche sur l'environnement alpin (CREALP), Sion, Switzerland

<sup>5</sup>Institute of Geography, University of Bern, Bern, Switzerland

<sup>6</sup>Department of Geosciences, University of Fribourg, Fribourg, Switzerland

<sup>7</sup>Oeschger Centre for Climate Change Research, University of Bern, Bern, Switzerland

**Correspondence:** Janosch Beer (beer@vaw.baug.ethz.ch)

**Abstract.** Englacial temperature measurements in the Alps remain sparse and biased toward high-elevation accumulation areas, leaving the thermal state of ablation zones poorly constrained. Here, we present borehole thermometry and ground-penetrating radar surveys from six small Swiss glaciers (< 0.5 km<sup>2</sup>, 2700-3800 m a.s.l.). Polythermal conditions are confirmed in three glaciers, with the cold-temperate transition surface at depths of 17-38 m and ice temperatures ranging from temperate to -2.1°C. A fourth site, Glacier du Sex Rouge, likely retains its historically documented polythermal structure, but borehole measurements were limited to the near-surface cold layer and do not reach the temperate ice below. A consistent spatial pattern emerges, with temperate ice at higher elevations transitioning into fully or partially cold-based glacier termini. Ground-penetrating radar retrievals are generally consistent with borehole-derived thermal conditions, with low scattering in cold ice and enhanced scattering in temperate zones. The observed thermal structures are closely linked to the history of firn cover loss, reconstructed from long-term mass balance records, with sites that lost their firn cover earliest showing the most advanced cooling. Our findings suggest that polythermal conditions among small Alpine glaciers may be more widespread than previously recognised, with important implications for glacial hazard assessments and highlighting the need for systematic regional-scale thermal observations and modelling.

### 1 Introduction

The glacier thermal structure influences key glacier processes, including ice deformation, ice viscosity, and basal sliding, as well as the storage and drainage of meltwater (Jansson, 1996; Flowers and Clarke, 2002; Boon and Sharp, 2003; Cuffey and Paterson, 2010). Glacier thermal conditions are generally classified into three categories: (1) fully temperate, where all ice is at the pressure melting point (PMP), (2) cold, where ice temperatures remain below the PMP, or (3) polythermal, where both cold and temperate ice coexist within a glacier. Englacial temperature is influenced by multiple factors, including the surface

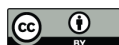

20 energy balance, ice advection, internal heat production due to strain heating, geothermal heat flux, and latent heat release from refreezing water (Cuffey and Paterson, 2010).

Despite their importance, englacial temperature measurements remain sparse. In the Alps, existing observations are biased toward high-altitude accumulation areas (Haerberli and Alean, 1985; Haerberli and Funk, 1991; Suter and Hoelzle, 2002; Hoelzle et al., 2011) (Supplementary Fig. S1), where limited energy availability has historically resulted in predominantly cold thermal structures. More recent studies using both modelling and direct measurements have reported increasing englacial temperatures at these elevations (Vincent et al., 2020; Mattea, 2020; Gastaldello et al., 2025), a trend linked to extended melt seasons and latent heat release from refreezing meltwater in firn. In contrast, observations from ablation areas at lower elevations are scarce. A small number of measurements exist from large valley glaciers below 3000 m a.s.l., primarily dating back to the 1970s (Haerberli, 1976), as well as early pioneering measurements from the nineteenth century (Hugi, 1842; Agassiz, 1847). More recent ablation-area measurements are limited to a few notable exceptions: Glacier de Tête Rousse (Vincent et al., 2012), Vadret dal Corvatsch (Haerberli et al., 2004), Vadret Muragl, Vadret da Rims (Engadin, Switzerland) and Glacier du Sex Rouge (Fischer, 2018).

At these lower elevations, the thermal response of glaciers to atmospheric warming may differ fundamentally from their high-elevation counterparts, as firn loss reduces meltwater retention and the associated latent heat release from refreezing. Where firn is absent, the loss of latent heat from refreezing can outweigh other heat inputs, allowing the ice to cool despite rising air temperatures (Wilson and Flowers, 2013; van Pelt et al., 2016). While this effect has been studied in Arctic glaciers (Irvine-Fynn et al., 2006, 2011; Delcourt et al., 2013; Karušs et al., 2022), it has received comparatively little attention elsewhere (Gilbert et al., 2012; Huss and Fischer, 2016). Such cooling may promote the development of polythermal structures and is expected to be particularly relevant for small glaciers where limited ice flow and internal deformation (Huss and Fischer, 2016) result in reduced strain heating. Despite this expected sensitivity, the englacial thermal regime of small Alpine glaciers undergoing rapid firn loss remains almost entirely unobserved.

Understanding where and when such polythermal structures develop has direct relevance for glacier hazard assessment. While thermal conditions alone do not directly cause instability, they can promote preconditions for ice break-offs, avalanches (Kavanaugh and Clarke, 2001; Faillettaz et al., 2015; Bondesan and Francese, 2023), glacier lake and water pocket outburst floods (Röthlisberger, 1978; Huggel et al., 2004; Vincent et al., 2012), and even large-scale glacier detachments (Gilbert et al., 2018; Käab et al., 2018; Jacquemart et al., 2020). In particular, polythermal glaciers are thought to be prone to the development of hazardous conditions, as the presence of cold ice can inhibit the development of efficient drainage systems, increasing a glacier's susceptibility to accumulate meltwater beyond its drainage capacity (Wadham et al., 2001; Vincent et al., 2012; Karušs et al., 2022; Jacquemart et al., 2024). A recent example is the 2022 collapse of the Marmolada Glacier (Dolomites, Italy), which caused 11 fatalities and has been linked to a polythermal configuration in which cold basal ice likely prevented efficient meltwater drainage, leading to a frontal ice break-off (Bondesan and Francese, 2023; Olivieri and Bettanini, 2023). Assessing the hazard potential of alpine glaciers therefore requires a better understanding of the distribution of polythermal glaciers. Unfortunately, the lack of observations currently precludes any predictions about which glaciers might fall into this category, especially in the aforementioned mid-elevation range.

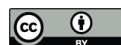

55 To address this knowledge gap, we instrumented six small ( $< 0.5 \text{ km}^2$ ) glaciers in the Swiss Alps, spanning an elevation  
range of 2700 m to 3800 m a.s.l.. In addition to several new glaciers, we included Glacier du Sex Rouge and Vadret dal  
Corvatsch in our study, where previous englacial temperature measurements (Haeberli et al., 2004; Fischer, 2018) enable a  
direct assessment of thermal change over decadal timescales. At all sites we measured englacial temperatures in boreholes  
60 during the summers of 2024 and 2025 and performed ground-penetrating radar (GPR) surveys to provide spatially continuous  
proxies for the thermal conditions, exploiting the sensitivity of radar scattering to liquid water content. To contextualise the  
observed thermal structures, we reconstructed the evolution of the firn cover from the 1970s to present, drawing on measured  
and modelled mass balance data (GLAMOS - Glacier Monitoring Switzerland, 2025).

## 2 Study sites

To address the observational gap identified above, site selection was guided by the following criteria:

- 65 1. Elevation; targeting glaciers below the current firn line where ongoing firn loss enhances susceptibility to conductive  
cooling and englacial temperature observations remain scarce.
2. Size; with a preference for very small glaciers ( $< 0.5 \text{ km}^2$ ) where strain heating can be expected to be minimal (Huss  
and Fischer, 2016)
3. Limited crevassing, which reduces surface permeability and meltwater infiltration (Huss and Fischer, 2016; Gilbert et al.,  
70 2019)
4. An availability of previous englacial temperature measurements, enabling direct comparison with past observations.
5. Accessibility.

Following these criteria, we selected six small glaciers ( $< 0.5 \text{ km}^2$ ) in the Swiss Alps: Alphubel South, Chessjengletscher,  
Hohsaasgletscher, Glacier du Sex Rouge, Glacier de Tortin, and Vadret dal Corvatsch (hereafter Alphubel, Chessjen, Hohsaas,  
75 Sex Rouge, Tortin, and Corvatsch, respectively; Table 1; Fig. 1 and 2). The sites cover an elevation range from ca. 2700 m  
to 3800 m a.s.l. and mean surface slopes between  $15^\circ$  and  $33^\circ$ . The sites span all aspects, although the majority are located  
on north- and west-facing slopes. Three sites (Sex Rouge, Tortin, and Corvatsch) are part of the GLAMOS mass balance  
monitoring network, providing multi-year surface mass balance records as context for the thermal observations (Huss et al.,  
2026). For Sex Rouge and Corvatsch past borehole observations are available as indicated in Table 1.

## 80 3 Data and Methods

We conducted two field campaigns in the summers of 2024 and 2025. During the initial campaign in August 2024, we drilled  
shallow boreholes on all six glaciers to depths of approximately 15 m and equipped them with two thermistors (cf. Sec. 3.1.2).

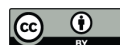

**Table 1.** Key characteristics of the six study sites. Area and elevation range were derived from SwissALTI3D Digital Elevation Model (DEM) (Swisstopo, 2023) clipped to the 2023 Swiss Glacier Inventory (SGI2023) outlines (Huss et al., 2025). Centre coordinates are given in the Swiss coordinate system (LV95; EPSG:2056). **Mean slope and aspect were averaged over all glacier pixels.** For Chessjengletscher, this study focused on the lower ice body (area and slope given in parenthesis). The year when in-situ measurements were started in the frame of GLAMOS measurements is given. Previous *T*: references to englacial temperature measurements prior to this study.

| Glacier                   | Centre (E, N) [m] | Area<br>[km <sup>2</sup> ] | Elev. range<br>[m a.s.l.] | Aspect | Slope<br>[°] | in-situ<br>(since) | Previous <i>T</i>      |
|---------------------------|-------------------|----------------------------|---------------------------|--------|--------------|--------------------|------------------------|
| Alphubel South (AH)       | 2633189, 1100627  | 0.07                       | 3684–3890                 | SW     | 33           | 2023               | –                      |
| Chessjengletscher (CJ)    | 2637008, 1101741  | 0.21 (0.12)                | 2881–3252                 | N      | 28 (22)      | 2023               | –                      |
| Hohsaasgletscher (HS)     | 2643538, 1109805  | 0.15                       | 3229–3504                 | W      | 24           | 2023               | –                      |
| Glacier du Sex Rouge (SR) | 2582698, 1130658  | 0.22                       | 2714–2862                 | NW     | 15           | 2011               | Fischer (2018)         |
| Glacier de Tortin (GT)    | 2589973, 1103477  | 0.49                       | 2780–3251                 | NW     | 20           | 2014               | –                      |
| Vadret dal Corvatsch (CV) | 2783238, 1143337  | 0.14                       | 3073–3365                 | E      | 20           | 2012               | Haeberli et al. (2004) |

In parallel, we conducted ground-based GPR surveys on all glaciers except Alphubel (cf. Sec. 3.2). Follow-up visits in September and October 2024 were used to retrieve initial thermistor data after sensor equilibration. A second field campaign between 5 and 13 August 2025 included the retrieval of the complete shallow temperature records and the drilling of additional deep boreholes to the glacier bed at Alphubel, Chessjen, and Hohsaas. We retrieved temperature data from these deeper boreholes after one month (16-17.09.2025), with the exception of Chessjen, where a second readout was conducted in mid-December 2025. Additional radar measurements included a GPR survey at Alphubel in May 2025 and an uncrewed aerial vehicle (UAV)-based GPR survey at Hohsaas in September 2025. Furthermore, mass balance measurements were conducted at all six study sites. End-of-melt-season stake readings were performed between August and October 2024 and 2025, with stake networks ranging from two to seven mass balance stakes per glacier. Snow depth measurements were collected in April and May 2025. A timeline of all borehole instrumentation and GPR surveys across the six study sites is given in Fig. 3.

### 3.1 Borehole temperature measurements

#### 3.1.1 Drilling and borehole locations

During the initial campaign in August 2024, we drilled two shallow boreholes on each of the six glaciers using a Heucke steam drill (Heucke, 1999). We selected this system for its portability, even though it limited maximum borehole depth to 15 m. Attained borehole depths ranged from 7 to 15.6 m, reaching bedrock at the shallowest sites. We generally selected one borehole at higher and one at lower elevation per glacier to capture contrasts in surface settings. At Corvatsch and Sex Rouge, locations were chosen to allow comparison with previous measurements. Shallow boreholes for ablation stakes were drilled using a Kovacs ice auger powered by an electrical hand drill, which was also used to pre-drill the upper few meters of

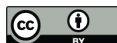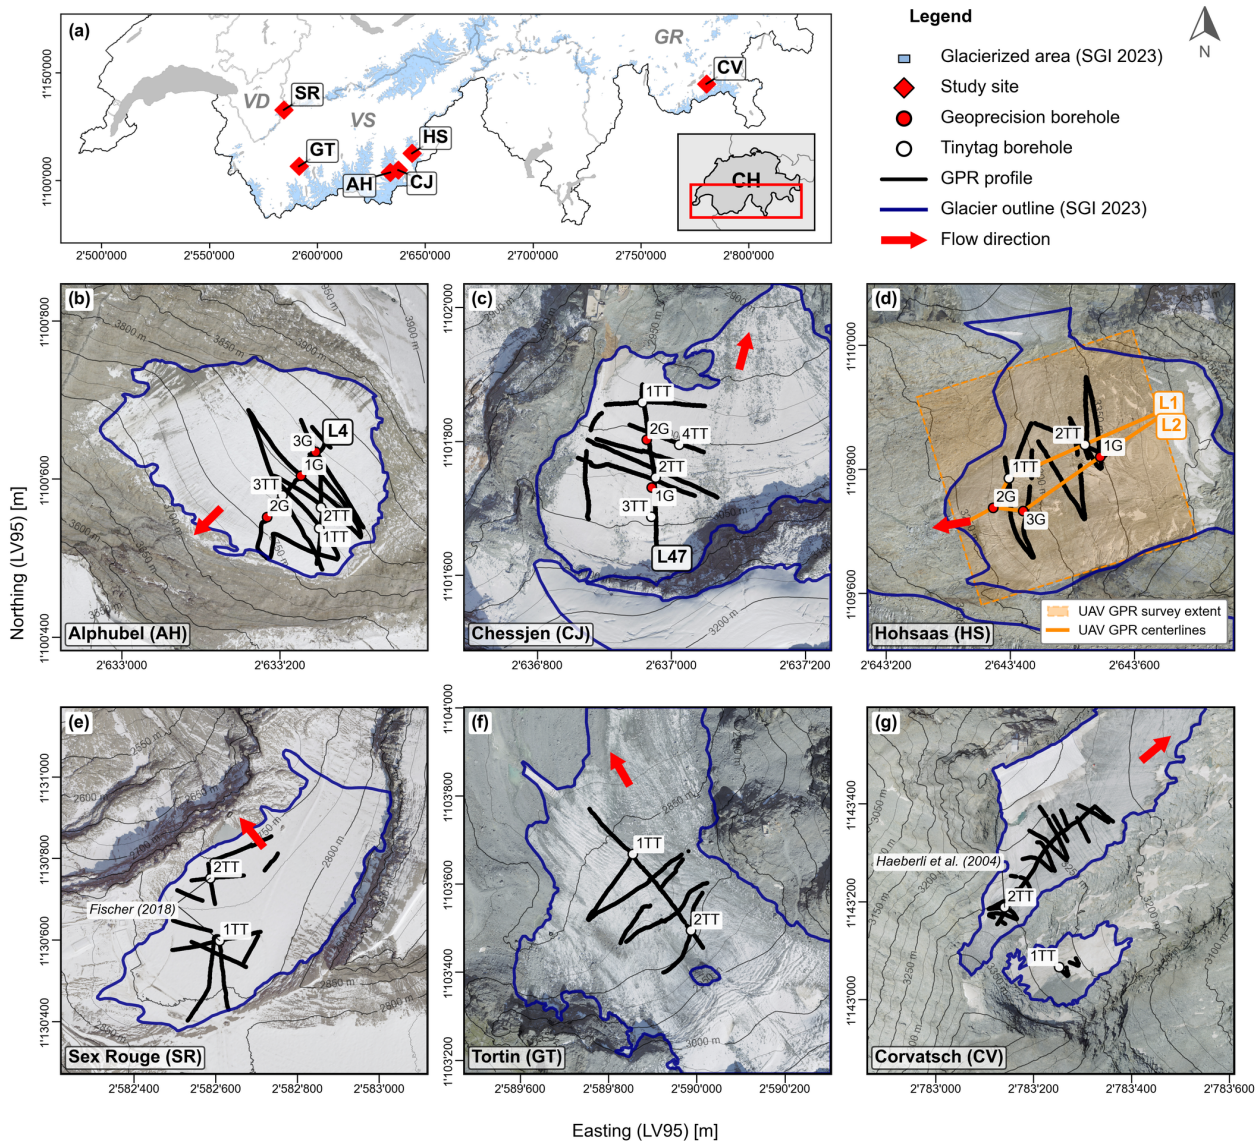

**Figure 1.** Overview and detailed maps of the six glaciers investigated in this study. (a) Location of study sites with cantonal boundaries and glacierized area according to the Swiss Glacier Inventory 2023 (SGI2023) (Huss et al., 2025). (b-g) Alphubel (AH), Chessjen (CJ), Hohsaas (HS), Sex Rouge (SR), Tortin (GT), and Corvatsch (CV), showing field installations on orthophotos (Swisstopo, 2024) with contour lines (Swisstopo, 2023) and SGI2023 glacier outlines. Red arrows indicate approximate flow direction. Boreholes are distinguished by the type of thermistor string (see legend) and labeled profiles indicate transects used for temperature interpolation (L4, L47, L1, L2). Annotations on SR and CV mark sites of prior temperature measurements (Haerberli et al., 2004; Fischer, 2018). For Hohsaas (d), the survey extent and the extracted centerlines of a UAV-based GPR survey are indicated.

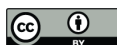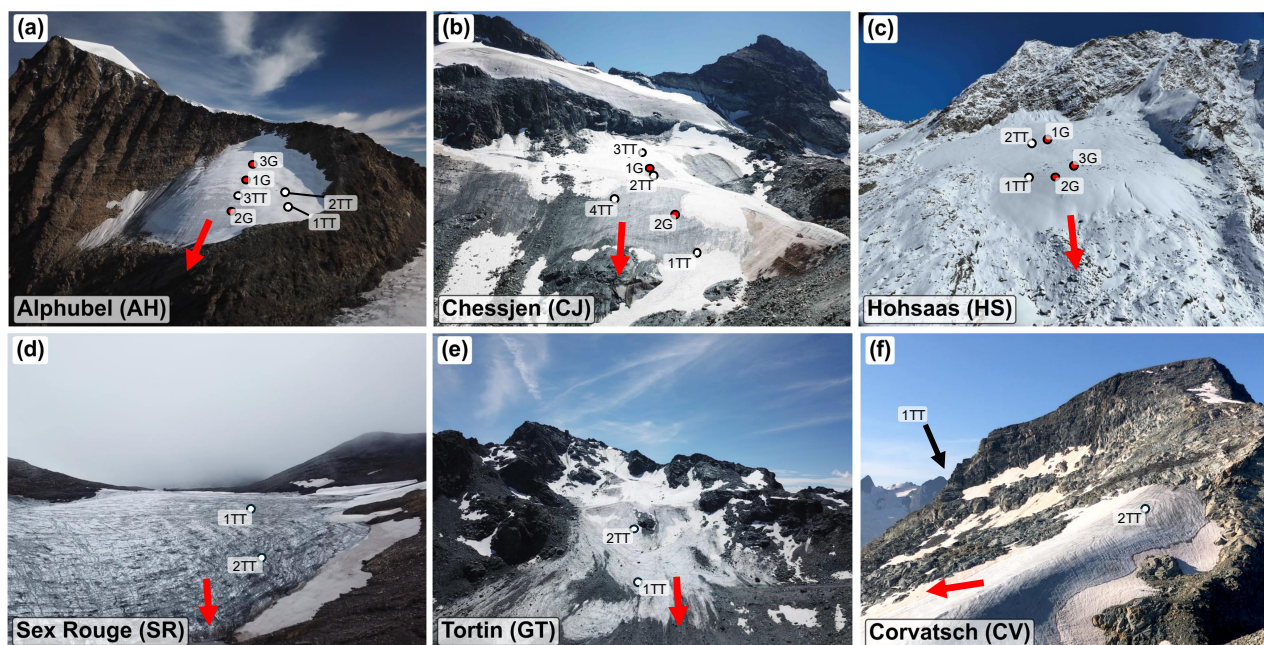

**Figure 2.** Overview images of the six study sites taken in July–August 2025: (a) Alphubel, (b) Chessjen, (c) Hohsaas, (d) Sex Rouge, (e) Tortin, and (f) Corvatsch. Approximate borehole locations are marked on each image and color-coded by sensor type: Geoprecision (G, red) and Tinytag (TT, white). The red arrow indicates the approximate flow direction of each glacier.

deeper boreholes. Ablation stake readings were used to monitor local melt and adjust the effective measurement depth of the thermistors.

Based on the preliminary insights from the 2024 data, in 2025 we drilled boreholes to the glacier bed at Alphubel, Chessjen, and Hohsaas to acquire complete vertical temperature profiles. Drilling was conducted using a hot-water drill system consisting of a **Kärcher HD 9/23G pressure pump connected to a HG43 flow heater** (Supplementary Fig. S2). In this manner we drilled eleven additional boreholes (four each at Alphubel and Chessjen, three at Hohsaas), with depths ranging from 20 to 58.3 m and with seven of them reaching bedrock. Boreholes were positioned near the glacier centerline and, where possible, in a way to fill gaps from the 2024 campaign. We surveyed all borehole positions using a GNSS antenna, which also enabled calculation of annual glacier surface displacement rates for the 2024 boreholes (Supplementary Table S14). Across both campaigns, we drilled a total of 23 boreholes. Table A1 in the Appendix provides an overview of locations, elevations, depths, and sensor types, while Figs. 1b–g and 2 illustrate borehole positions and local topography.

### 3.1.2 Measurements and calibration

Depending on the borehole depth, we used two thermistor setups: Tinytag Plus 2 (TGP-4520) loggers from Gemini Data Loggers for shallow boreholes, and multi-sensor thermistor chains from Geoprecision for deeper boreholes.

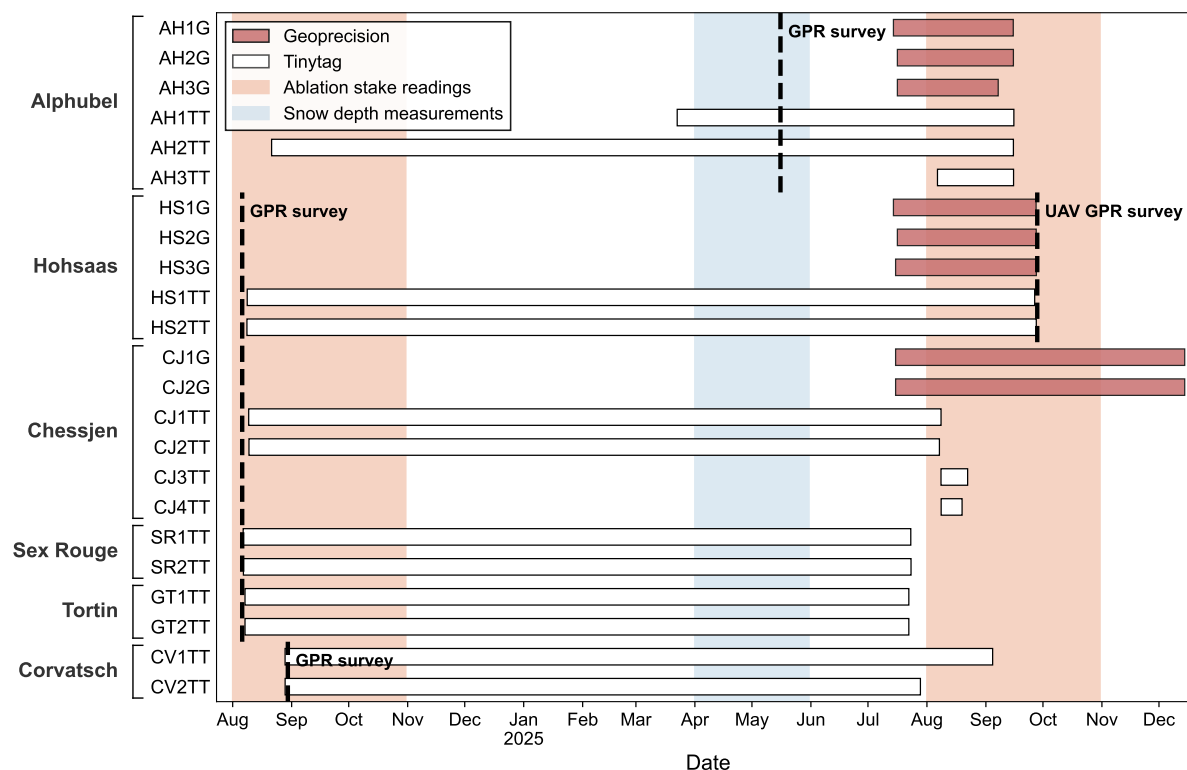

**Figure 3.** Timeline of borehole instrumentation, GPR and mass balance surveys across all study sites. Bars indicate thermistor timeseries color coded by manufacturer. All loggers remain active; bar ends denote the date of last readout. Black dashed lines indicate GPR survey dates.

115 During the 2024 campaign, we installed Tinytag loggers in weatherproof enclosures mounted on aluminum plates and secured to ablation stakes at the borehole sites (Supplementary Fig. S3a). Each logger records two Tinytag PB-5010 negative temperature coefficient (NTC) thermistors with a nominal accuracy of  $\pm 0.2^\circ\text{C}$ . We positioned the sensors so that one reached the maximum borehole depth and the second was installed five meters above. Since our shallow boreholes were approximately 15 m deep, this configuration typically provided measurements at depths of about 10 m and 15 m. For the Tinytag sensors, which operated over a full year, we were able to compute the actual sensor depth at the time of readout by accounting for surface melt measured at the stake locations between installation and retrieval.

120

The Geoprecision multi-sensor thermistor chains, deployed in the deep boreholes, were secured by taping the logger at the top of each chain to a 1 m wooden stick over the borehole (Supplementary Fig. S3b). Depending on borehole depth, the chains contained 5–10 TNodeHD thermistors that were spaced between 2.5 and 5 m apart. Like the Tinytag sensors, the TNodeHD thermistors use NTC sensors but offer higher measurement accuracy ( $\pm 0.05^\circ\text{C}$ ) and a temperature resolution of  $0.0001^\circ\text{C}$ .

125

Before field deployment, we calibrated all thermistors to quantify sensor-specific offsets relative to  $0^\circ\text{C}$ . We calibrated Tinytag thermistors using an ice-bath setup after 1–2 hours of thermal equilibration, and we calibrated the Geoprecision chains

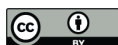

in a temperature-controlled alcohol bath (Huber CC245 WL) with a high-precision reference thermometer (ISOTECH F250) (Supplementary Fig. S4). We then applied the derived offsets to all sensors before analysis. A detailed description of the calibration procedures, including stability criteria and a statistical overview of the offsets, is provided in Sect. 2.3 of the Supplement.

### 3.2 Ground-penetrating radar (GPR) surveys

Two GPR systems were used in this study: a ground-based system deployed at all sites, and a UAV-based system used at Hohsaas. An overview of the setups for both systems is provided in Fig. S6 (Supplementary).

All ground-based GPR surveys were conducted using a Sensor & Software pulseEKKO Pro system. Antennas operated at a central frequency of 100 MHz, except for the survey on Alphubel where we used 250 MHz. Antenna positions were tracked in real-time with a Leica differential GNSS receiver. Depending on surface conditions, the antennas were either carried approximately 50 cm above the surface or, in areas with sufficient snow cover (Sex Rouge, Corvatsch, Alphubel), mounted on a sledge and pulled at approximately 10 cm above the surface. In both configurations, a constant separation of 2 m between transmitter and receiver was maintained. At most sites, the survey included a profile approximately along the glacier centerline connecting the borehole locations.

At Hohsaas, we employed a recently developed UAV-based GPR system (Ruols et al., 2023), using an M300 RTK UAV (DJI) carrying a GPR unit with a single transmit receive antenna at a center frequency of 80 MHz. Survey line positions were determined using a D-RTK 2 high-precision GNSS mobile station (DJI). By flying a regular grid of parallel lines with 4 m spacing oriented approximately along the glacier contours, we obtained a 3D data cube covering nearly the entire glacier area. For the thermal interpolation, we extracted two down-slope profiles from this grid by sampling across the survey lines, each profile intersecting three boreholes.

All ground-based GPR data were processed using a standard workflow in Geolix (Geolix Technologies Inc., 2020); details are provided in Sect. 2.7.1 of the Supplement. The UAV-based GPR data from Hohsaas were processed using a separate workflow described in Sect. 2.7.2 of the Supplement. In both cases, the basal reflection was manually picked and ice thickness computed as the difference between surface and bed elevations, establishing the geometric framework needed for interpolation of the temperature data. We primarily used the radar data to characterise the englacial thermal structure: In GPR data, temperate ice containing free water at grain boundaries produces diffuse scattering and signal attenuation, whereas cold ice is largely transparent to radar (Pettersson et al., 2004; Vincent et al., 2012; Wilson et al., 2013; Sevestre et al., 2015; Gilbert et al., 2019; Forte et al., 2025). The cold-temperate transition surface (CTS) is therefore identifiable as the boundary between diffuse scattering and low-reflectivity zones, used here to independently validate borehole-derived CTS positions and to extend the thermal interpretation beyond the borehole network.



### 3.3 Borehole temperature analysis

#### 3.3.1 Temperature data analysis

160 The temperature data were analysed with two objectives: characterising the seasonal thermal signal at each site, and construct-  
ing time-averaged vertical temperature profiles for spatial interpolation. The Tinytag time series (boreholes 1TT and 2TT),  
which cover nearly a full annual cycle (Fig. 3), are used to characterise seasonal variations, estimate the depth of the zero an-  
nual amplitude (ZAA; See Sect. 2.6 Supplementary), and identify transient events such as short-term warming following water  
intrusion. This analysis is presented in Sect. 4.1. At Sex Rouge and Corvatsch, where historical temperature measurements are  
165 available, the continuous Tinytag record also allows a day-to-day comparison with the historical data, which consist of single  
transient measurements.

To construct vertical temperature profiles, we averaged temperatures over the measurement period for each sensor, excluding  
an initial equilibration phase of 14 days following installation to allow the borehole to refreeze and temperatures to stabilise.  
Sensor depths were corrected for cumulative surface melt between installation and readout, using the melt-corrected final depth  
170  $z_{\text{final}}$  as the effective measurement depth for interpolation. The interpolation was restricted to Alphubel, Chessjen, and Hohsaas,  
where the installation of additional thermistor chains provided a higher density of observations, including measurements at or  
near the glacier bed. The interpolated temperature fields were subsequently compared against ground-penetrating radar reflect-  
ivity patterns to assess their consistency and to avoid over-interpretation of areas without direct temperature measurements.

Finally, boreholes were assigned to one of three thermal regime categories based on the fraction of temperature measure-  
175 ments at or above 0°C within sensor precision (0.05°C for Geoprecision, 0.20°C for Tinytag): to-bed boreholes with less than  
2% such measurements were classified as cold-based. Those with 50% or more as mostly temperate, all others as mostly cold.  
These categories are used in Fig. 9 to contextualise borehole locations within the firn cover reconstruction.

#### 3.3.2 Interpolation and CTS detection

Borehole temperature data were interpolated along downslope profiles, connecting as many borehole locations as possible.  
180 This resulted in one profile for Alphubel and Chessjen and two profiles for Hohsaas, extracted by sampling across the contour-  
parallel UAV-GPR survey lines. The profiles (L4, L47, L1, L2) are marked in Fig. 1a-c. Interpolation was performed using  
Radial Basis Function (RBF) interpolation (Hardy, 1971), implemented via the `RBFInterpolator` routine of the SciPy  
library (Virtanen et al., 2020). RBF interpolation is well suited for this application as it makes no assumptions about the  
spatial pattern of the temperature field and handles sparse, unevenly distributed observations well. To account for the strong  
185 vertical temperature gradients (compared to horizontal) (Cuffey and Paterson, 2010), the vertical coordinate was scaled prior  
to interpolation. The scaling factor was determined empirically from the ratio of observed vertical to horizontal temperature  
gradients in the borehole data. A multiquadric kernel was used and the interpolated field was evaluated on a regular grid masked  
to the glacier geometry. A detailed description of the interpolation scheme is provided in Sect. 2.4 of the Supplement.



The position of the cold-temperate transition surface (CTS) was estimated by identifying grid cells where the interpolated  
190 temperature approached the pressure-dependent melting point, following the Clausius-Clapeyron relation with  $\beta = 8.7 \times 10^{-4}$   
 $^{\circ}\text{C m}^{-1}$  (Cuffey and Paterson, 2010) and a tolerance of  $\delta_{\text{CTS}} = 0.05$   $^{\circ}\text{C}$ . Details are given in Sect. 2.5 of the Supplement.

### 3.4 Mass balance and long-term firn cover development

Annual point mass balance was measured at all Tinytag borehole locations (1TT and 2TT). Snow depth measurements were  
195 additionally collected across each glacier in April 2025 using manual probing at 15-60 points per site (Supplementary Fig. S8).  
Snow density was measured on site using a coring device, or adopted from measurements on nearby glaciers. At Corvatsch, Sex  
Rouge and Tortin, these measurements are part of monitoring programs started around 2010. Point measurements of ablation  
and accumulation were spatially extrapolated to the entire glacier using a distributed mass balance model (Huss et al., 2021),  
which accounts for spatial variability and the inhomogeneous distribution of field observations. This approach allows inferring  
surface mass balance distribution on a 10 m spatial grid constrained by the seasonal measurements.

200 The calibrated mass balance model can also be driven by meteorological forcing outside of the period covered by in-situ  
measurements. In this case, the model is constrained by observed long-term changes in ice volume (Huss et al., 2015). Sup-  
ported by the detailed measurements of the recent years, informing about the spatial variability of mass balance components,  
the model thus provides a gridded annual mass balance distribution for each glacier from 1970 to 2025. These grids were  
used to derive spatially distributed firn cover maps by cumulatively tracking mass balance at each grid cell through time. Firn  
205 thickness was updated annually by adding positive mass balance (accumulation) and removing negative mass balance (abla-  
tion) from the existing firn column, with ablation removing the most recently deposited layers first. Grid cells were classified  
as firn-covered if they accumulated snow in two consecutive years. This criterion excluded single years with a larger end-of-  
season snow extent from the firn extent. Firn layers persisting for more than 20 years were considered ice. This threshold was  
arbitrarily chosen and represents a simple assumption consistent with typical densification timescales in the Alps (Ambach and  
210 Eisner, 1966). This approach yields annual maps of firn thickness and extent from 1970 to 2025 for each glacier. From the  
annual firn cover maps we computed the time since firn loss for each cell.

## 4 Results and discussion

### 4.1 Seasonal temperature variations and meltwater signals

Tinytag sensors installed in 2024 recorded nearly a full annual temperature cycle at all six sites (Fig. 4). Over the measurement  
215 period, surface melt thinned the ice above each sensor, so that effective sensor depths changed between installation ( $Z_{\text{init}}$ ) and  
retrieval ( $Z_{\text{final}}$ ). For simplicity, all depths stated in the following refer to the installation depth. The reduction in effective depth  
ranged from approximately 0.4 m to more than 2 m, meaning that sensors progressively sampled shallower ice over the course  
of the measurement period. We expect this to result in slightly larger observed seasonal amplitudes. Seasonal temperature  
amplitudes varied by nearly two orders of magnitude across sensors and sites, with the largest recorded amplitude of 3.64 $^{\circ}\text{C}$  at

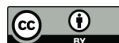

220 Tortin (GT1TT, 4.2 m), the smallest of 0.03°C at Hohsaas (HS1TT, 15.6 m). As expected, amplitudes decreased systematically with depth and the temperatures at depths of 10 m to 15 m lagged roughly six months behind the surface, meaning that the lowest temperatures occurred in the summer, the highest in winter.

At Alphubel, Chessjen, Hohsaas, and Sex Rouge, temperatures showed no sign of approaching 0°C at the instrumented depths (6.8-15.4 m), suggesting that the winter cold wave could not be compensated during summer. Two sensors are exceptions  
225 to this: SR2TT (10 m) and HS1TT (15.6 m), whose temperature maxima (-0.18°C and -0.1°C, respectively) fall within sensor accuracy, meaning temperate conditions at these depths are likely. Shallow sensors at Tortin and Corvatsch were trending towards 0°C by the end of the observation period and are most likely approaching temperate conditions later in the year. The final readout was conducted before the 2025 summer warming signal had fully propagated through the ice column. GT1TT (4.2 m) and CV1TT (2.0 m) are therefore expected to reach their annual maximum during or shortly after the melt season,  
230 while sensors at 10 to 15 m depth likely do so between December and March.

At Chessjen, Hohsaas, and Sex Rouge, mean temperatures increase with depth. Deeper temperatures are on average 1.2-1.5°C warmer than shallower ones at Chessjen, 0.6-0.9°C warmer at Hohsaas, and approximately 0.1°C warmer at Sex Rouge. This distinction is less obvious at Alphubel, where mean temperatures appear to vary more with borehole position than with depth, ranging from -2.0 to -2.2°C at AH2TT (the upper borehole) and from -2.3 to -2.7°C at AH1TT further downslope. At  
235 Alphubel, Chessjen, Hohsaas, and Sex Rouge, where the deepest sensors exhibit amplitudes below 0.3°C, we estimated the depth of zero annual amplitude (ZAA; See Sect. 2.6 Supplementary) to range from 17 m at Alphubel to 23 m at Sex Rouge (see annotation in panels a-d).

Short-term temperature jumps are visible in both the Tinytag and Geoprecision time series data at Alphubel and Chessjen. At CJ2TT, the shallow sensor recorded an abrupt warming of 1.64°C on 18-19 July (Fig.4b), and at Alphubel, the upper borehole  
240 (AH1G) showed a temperature jump of approximately 0.15°C on 17-18 August (Supplementary Fig. S11a). Since these events occurred during the melt season and have transient character, we interpret them as the effect of englacial meltwater, likely routed via crevasses and englacial channels. The resulting temperature jumps reflect heat input to the surrounding ice, through direct exchange with liquid water, latent heat release upon refreezing, or both - processes central to the thermal structures discussed in Sect. 4.3.

#### 245 **4.2 Decadal changes of of englacial temperatures at Sex Rouge and Corvatsch**

The availability of previously published borehole data at Sex Rouge and Corvatsch provides a rare opportunity to investigate how englacial temperatures at these sites have evolved over decadal timescales (Fig. 5). The earlier measurements represent multiple, single-day snapshots, while our data comprise a full annual time series. To compare, we extracted the matching days of the year from our time series for each prior measurement date.

250 At Sex Rouge, Fischer (2018, data from 2013-2015) documented a polythermal structure with a cold surface layer of approximately 20 m overlying a temperate core. We also found a persistent cold surface layer with a strong temperature gradient trending to 0 °C with depth (Fig. 5a,b), suggesting that this polythermal structure likely still persists today. Relative to the 2013-2015 measurements, temperatures at 10 m rose by 0.65°C at SR2TT and by 0.23°C at SR1TT, while at 15.2 m tempera-

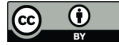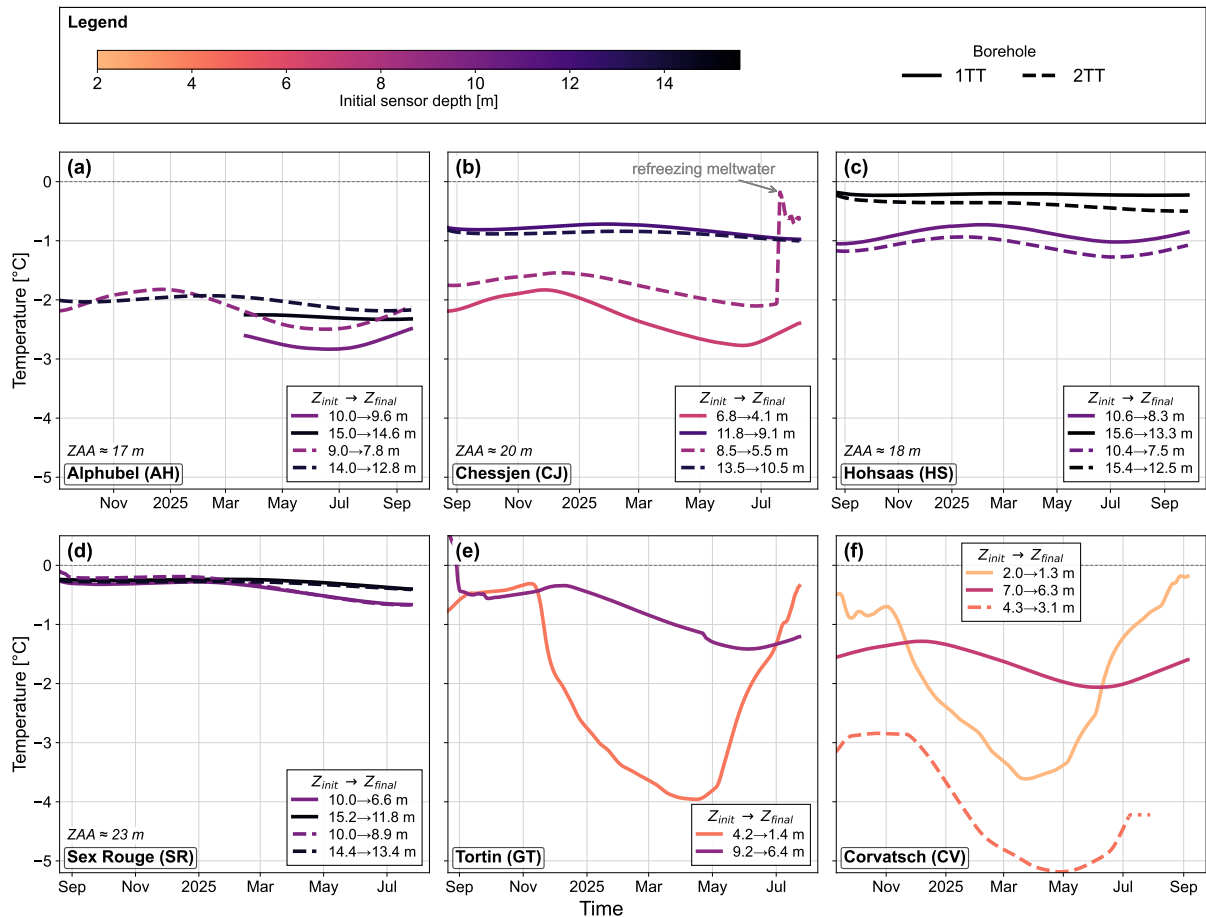

**Figure 4.** Seasonal evolution of englacial temperature at all six study sites from August 2024 to September 2025. Line colour indicates initial sensor installation depth, with solid lines denoting Tinytag borehole 1 (1TT) and dashed lines borehole 2 (2TT). For Glacier de Tortin, only borehole 1 is shown due to calibration issues affecting borehole 2. Each panel lists sensor installation depth ( $Z_{init}$ ) and depth at last readout ( $Z_{final}$ ). At CV2TT the lower sensor failed during the measurement period and is thus not shown. Where the seasonal amplitude at the deepest sensor was sufficiently small, the ZAA is indicated.

255 tures fell by  $0.11^{\circ}\text{C}$  at SR1TT, remaining within sensor accuracy ( $\pm 0.2^{\circ}\text{C}$ ). However, with approximately 20 m of surface ice  
 lost through ablation since 2013 (GLAMOS - Glacier Monitoring Switzerland, 2025), our sensors sample ice that was located  
 considerably deeper during the earlier measurement period. The hollow red diamonds in Fig. 5 show our current temperatures  
 projected to their estimated depths at the time of the prior measurements, illustrating this reference-frame shift. This vertical  
 shift complicates our interpretations. The observed signal reflects the effects of downward cold wave penetration and surface  
 removal of cold ice through ablation, rather than atmospheric forcing alone. These competing drivers are discussed further in  
 260 Sect. 4.4.



At Corvatsch, Haerberli et al. (2004) documented cold-based conditions with temperatures of approximately  $-4^{\circ}\text{C}$  at 13 m depth in 1999/2000. The glacier has since thinned to a point where the entire ice column, now only 9.3 m thick, is subject to seasonal temperature fluctuations (Fig. 4f). Temperatures at 4.3 m depth exhibit a clear seasonal cycle but remain sub-zero throughout the year, indicating that summer warming is insufficient to bring the ice to the melting point. Our measured temperatures at 4.3 m depth were on average  $-0.36^{\circ}\text{C}$  colder than the measurements at comparable depths from Haerberli et al. (2004), suggesting a slight cooling of the near-surface ice since 1999/2000. The lower sensor reached the bed at 9.3 m but failed during equilibration, recording  $-1.3^{\circ}\text{C}$  with temperatures still declining at the time of failure, suggesting the bed remains cold today. Among the six study sites, Corvatsch occupies a unique topographic position on a narrow ice ridge. The ridge geometry limits snow accumulation and firn formation while exposing both flanks to lateral conductive heat loss, providing an additional cooling pathway beyond surface forcing alone (Haerberli et al., 2004). The persistently cold conditions observed here are therefore at least partly a consequence of this inherently cold topographic setting, alongside the long firn-free history of the site, discussed further in Sect. 4.4.

### 4.3 Polythermal sites (Alphubel, Chessjen, Hohsaas)

Englacial temperature profiles at Alphubel, Chessjen, and Hohsaas reveal polythermal conditions at all three borehole sites (Fig. 6,7,8), with a recurring spatial pattern: a temperate core in the upper reaches of the glacier transitioning to partially and fully cold-based conditions near the glacier terminus.

In all three glaciers, we determined the CTS to be at relatively shallow depths of 17-20 m in the upper reaches, while ice near the termini was found to be predominantly cold (Figs. 6a, 7a, 8a,b). At Alphubel, temperate ice was confirmed between 25 m and 33 m depth at AH1G and between 20 m and 25 m at AH3G, with the transition to cold conditions occurring approximately 110 m upstream of the terminus (Fig. 6b). Notably, in both AH1G and AH3G, temperatures approach  $0^{\circ}\text{C}$  at intermediate depths but drop below  $0^{\circ}\text{C}$  again towards the bed, suggesting the temperate zone forms a sort of core zone. As neither AH1G nor AH3G have sensors shallower than 17 m, the cold ice overlying the temperate zone is not directly sampled but is assumed to correspond to the seasonally influenced surface layer (Sect. 4.1). At Chessjen, the CTS was identified at the two higher-elevation boreholes (CJ1G and CJ3TT) at depths of 17 m to 38 m, with the CTS descending towards the bed approximately 180 m upstream of the terminus, beyond which cold conditions dominate throughout (Fig. 7b). At Hohsaas, the CTS was identified at the higher-elevation borehole HS1G at a depth of 20 m and remains shallow (0 - 5 m) until approximately 150 m from the terminus, where it begins to descend towards the bed. At the northern profile L1, the ice becomes progressively thinner and colder, suggesting a more laterally extensive cold zone in this part of the glacier (Fig. 8a).

Despite a broadly similar thermal structure across the three sites, basal conditions differ. At Alphubel, bed temperatures remained cold throughout, reaching as low as  $-2.1^{\circ}\text{C}$  at the terminus. At Chessjen, CJ2G reached the bed at 17 m depth confirming temperate conditions in early August 2025, but cooled to  $-0.43^{\circ}\text{C}$  by mid-December (Supplementary Fig. S12b). We interpret this as a seasonally evolving basal thermal regime: meltwater sustains temperate conditions through summer, while basal refreezing occurs once melt ceases in autumn. At Hohsaas, HS2G confirmed temperate basal conditions close to

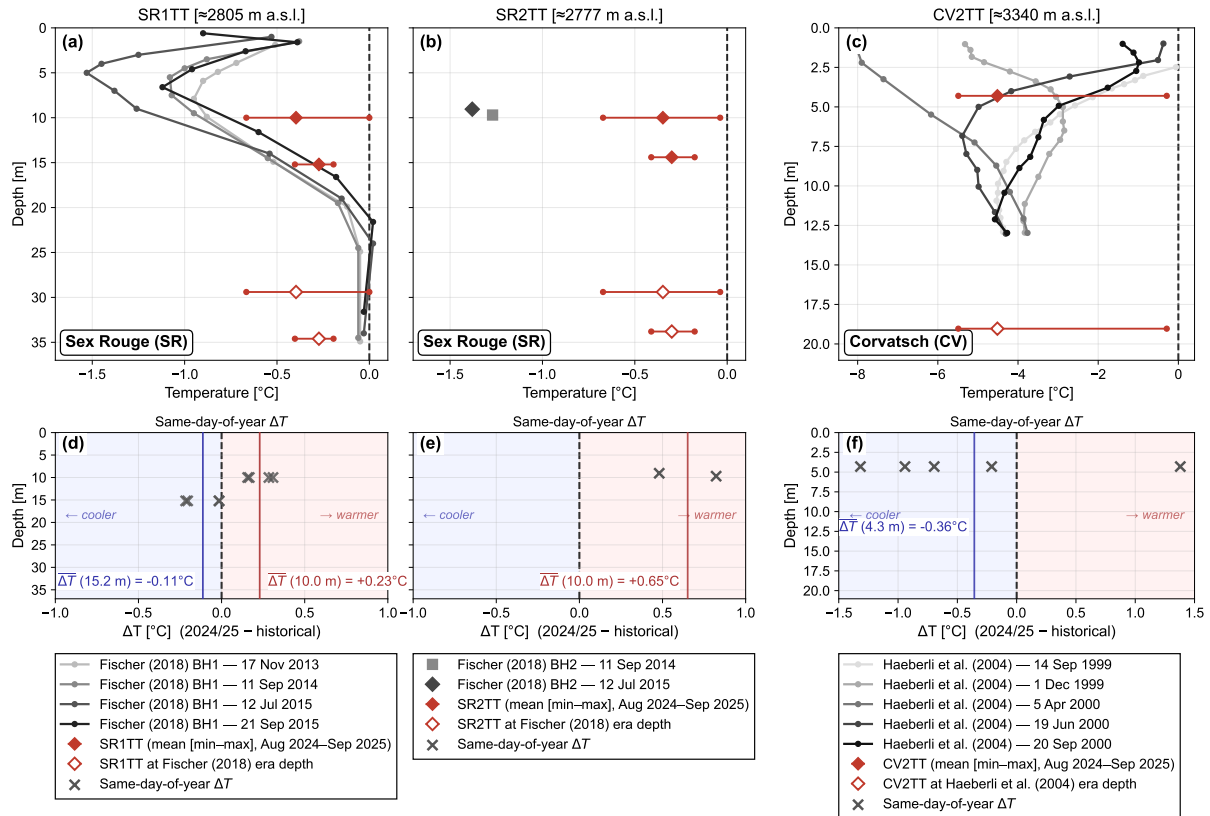

**Figure 5.** Englacial temperature profiles at Sex Rouge and Corvatsch compared with historical borehole data. (a) SR1TT versus four repeated profiles from BH1 by Fischer (2018). (b) SR2TT versus two single-point measurements from BH2 by Fischer (2018). (c) CV2TT versus five profiles by Haerberli et al. (2004). Red diamonds indicate the time-averaged temperature at each sensor depth over the Aug 2024–Sep 2025 measurement period; horizontal bars show the observed min–max range. (d–f) Temperature difference relative to historical measurements, computed by matching each historical snapshot to the same calendar day in our 2024/25 record; vertical lines indicate the mean difference  $\overline{\Delta T}$  at each sensor depth.

the terminus despite cold conditions in the overlying ice column, though basal coverage between HS2G and HS1G remains limited.

The GPR profiles at all three sites are broadly consistent with the borehole-derived thermal conditions, though the degree of agreement varies. At Alphubel (Fig. 6c), the profile shows a substantially cleaner signal than at the other two sites, with little scattering even in the area where boreholes confirmed temperate ice. This difference is at least partly attributable to survey timing: unlike the late-summer surveys at Chessjen and Høhsaas (August–September), the Alphubel GPR survey was conducted at the end of winter in mid-May (Fig. 3). At this time of year and at 3800 m a.s.l., liquid water is expected to be at its seasonal minimum regardless of thermal state, potentially suppressing scattering that would otherwise indicate temperate ice. Still, the clean signal below the seasonally influenced layer suggests limited englacial water content at depth, supporting



the cold bed interpretation derived from the borehole temperatures. At Chessjen (Fig. 7c), the scattering pattern corresponds well with the interpolated temperature field. Radar scatter is high throughout the temperate zone up-glacier and diminishes towards the terminus below CJ1G. Notably, scattering extends to the glacier surface in the upper part of the profile, suggesting the ice column is temperate throughout and that the CTS detected here reflects the seasonal penetration depth of the winter cold wave rather than a stable year-round thermal boundary. At Hohsaas (Fig. 8c), a qualitatively similar pattern is observed, with increased scattering around the upper borehole HS1G and a largely clean signal in the cold terminus. At both Chessjen and Hohsaas, enhanced near-bed scattering suggests that temperate basal conditions are likely more extensive than the borehole network resolves.

While polythermal glacier structures can arise through a variety of mechanisms (Irvine-Fynn et al., 2011), the consistent pattern observed across all three sites, with temperate ice confined to higher elevations and cold conditions prevailing towards the terminus, points to a shared underlying control on englacial heat distribution, a point that we further examine in the following.

#### 4.4 Firn cover loss as primary control on the thermal structure of small glaciers

Temperate ice within glaciers can be generated or sustained by several heat sources, including geothermal heat flux, strain heating associated with ice flow, latent heat release from refreezing of percolating meltwater, and advection of temperate ice from upstream (Cuffey and Paterson, 2010; Wilson and Flowers, 2013; Oerlemans, 2013; Gilbert et al., 2019; Law et al., 2021; Karlsson et al., 2021; Raspoet and Pattyn, 2025). The glaciers investigated here are all small ( $<0.5 \text{ km}^2$ ), meaning that internal heat production from strain heating is expected to be limited (Huss and Fischer, 2016), consistent with the low surface displacement rates observed at all sites (Supplementary Table S14). Advection of temperate ice from upstream can likewise be ruled out, as temperate conditions are predominantly observed in the upper glacier where no upstream source exists. Geothermal heat flux in the region is modest ( $< 80 \text{ mW m}^{-2}$ , Medici and Rybach 1995) and, as a basal heat source, cannot account for the temperate conditions observed throughout substantial portions of the ice column at these sites.

Instead, we believe that the observed thermal structure is primarily controlled by firn cover distribution and its temporal evolution. Firn acts as a meltwater reservoir, retaining water that percolates to depth, refreezes, and releases latent heat, warming the underlying ice and sustaining temperate conditions (Gilbert et al., 2012; Huss and Fischer, 2016; Gastaldello et al., 2025). The densification of temperate firn into glacier ice provides an additional, if secondary, supply of temperate ice to the system. Where firn is absent and meltwater runs off, both of these heat sources are lost and the ice can cool. This process chain is supported by modelling studies showing that meltwater refreezing and entrapment can dominate the internal heat budget of small polythermal glaciers, making the thermal structure highly sensitive to changes in surface melt and firn availability (Gilbert et al., 2012; Wilson and Flowers, 2013; Gilbert et al., 2014).

To examine the role of firn cover as a control on englacial thermal structure, we reconstructed its evolution across the six studied glaciers from the 1970s until today using modelled annual mass balance distribution constrained with GLAMOS mass balance data (Huss et al., 2015; GLAMOS - Glacier Monitoring Switzerland, 2025). Across the six sites, firn-free durations at

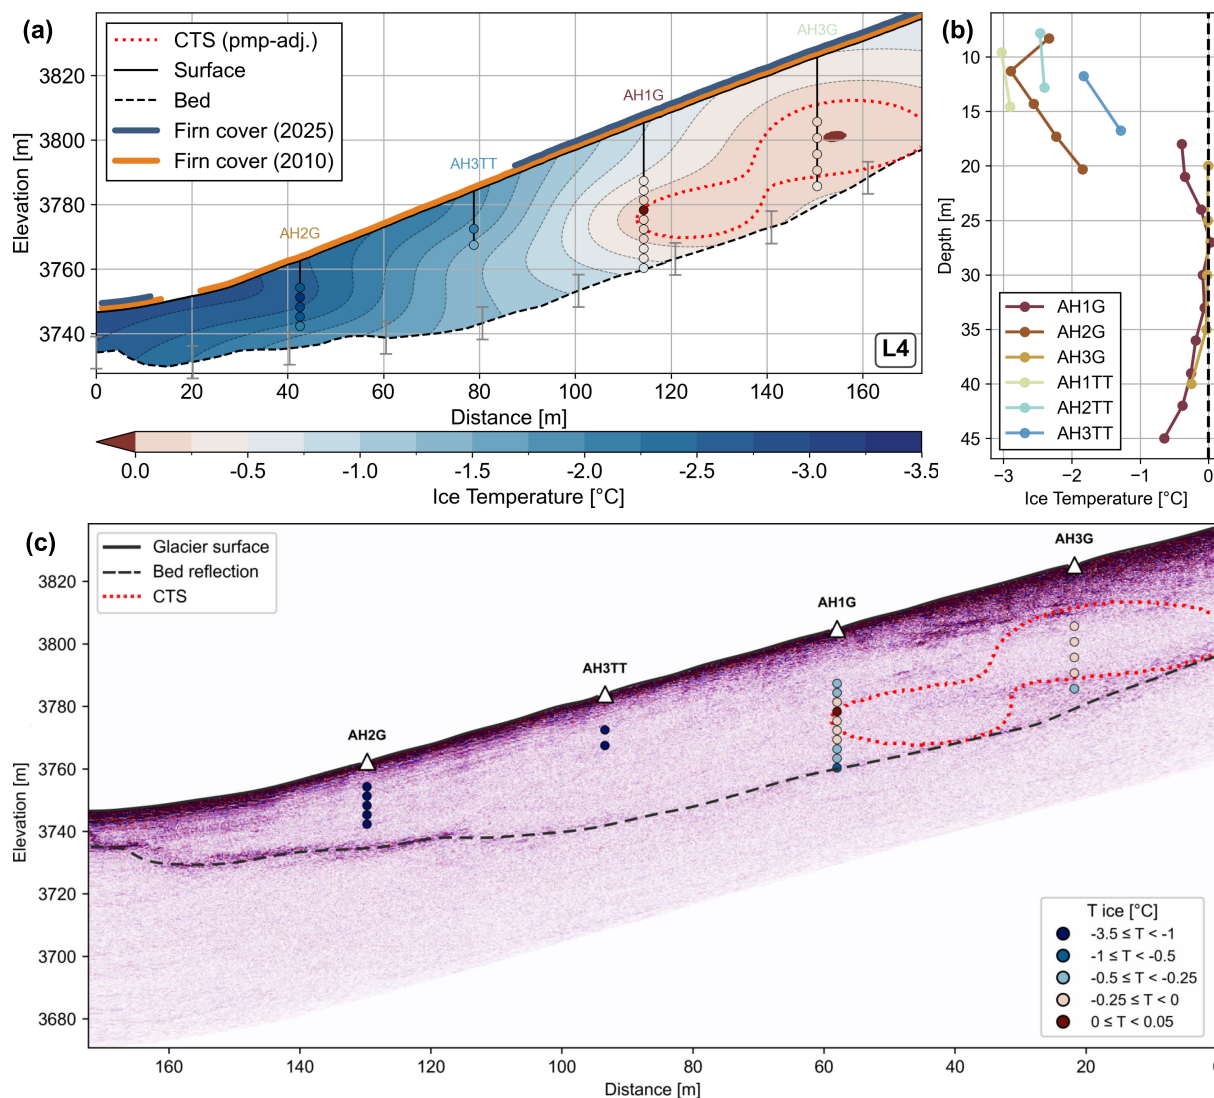

**Figure 6.** Englacial temperature structure and radar reflectivity along Alphubel profile L4 (for profile location, see Fig. 1a). (a) Interpolated englacial temperature field derived from borehole measurements. Temperatures at AH1G–AH3G and AH3TT are averaged over the period 10.08.–16.09.2025; AH1TT–AH2TT over September 2024–September 2025. Modelled firn cover extent is shown for 2010 (orange) and 2025 (blue). Whiskers along the bed denote  $\pm 5$  m bedrock-depth uncertainty. (b) Vertical temperature profiles for AH1G, AH2G, AH3G, and AH3TT; the dashed line marks the 0°C isotherm. (c) Depth radargram along profile L4 with borehole positions and the CTS derived from the interpolated temperature field.

the borehole locations span from less than a decade at Alphubel to more than three decades at Sex Rouge, Tortin and Corvatsch, providing a range of exposure histories against which to assess the thermal response to firn loss (Fig. 9).

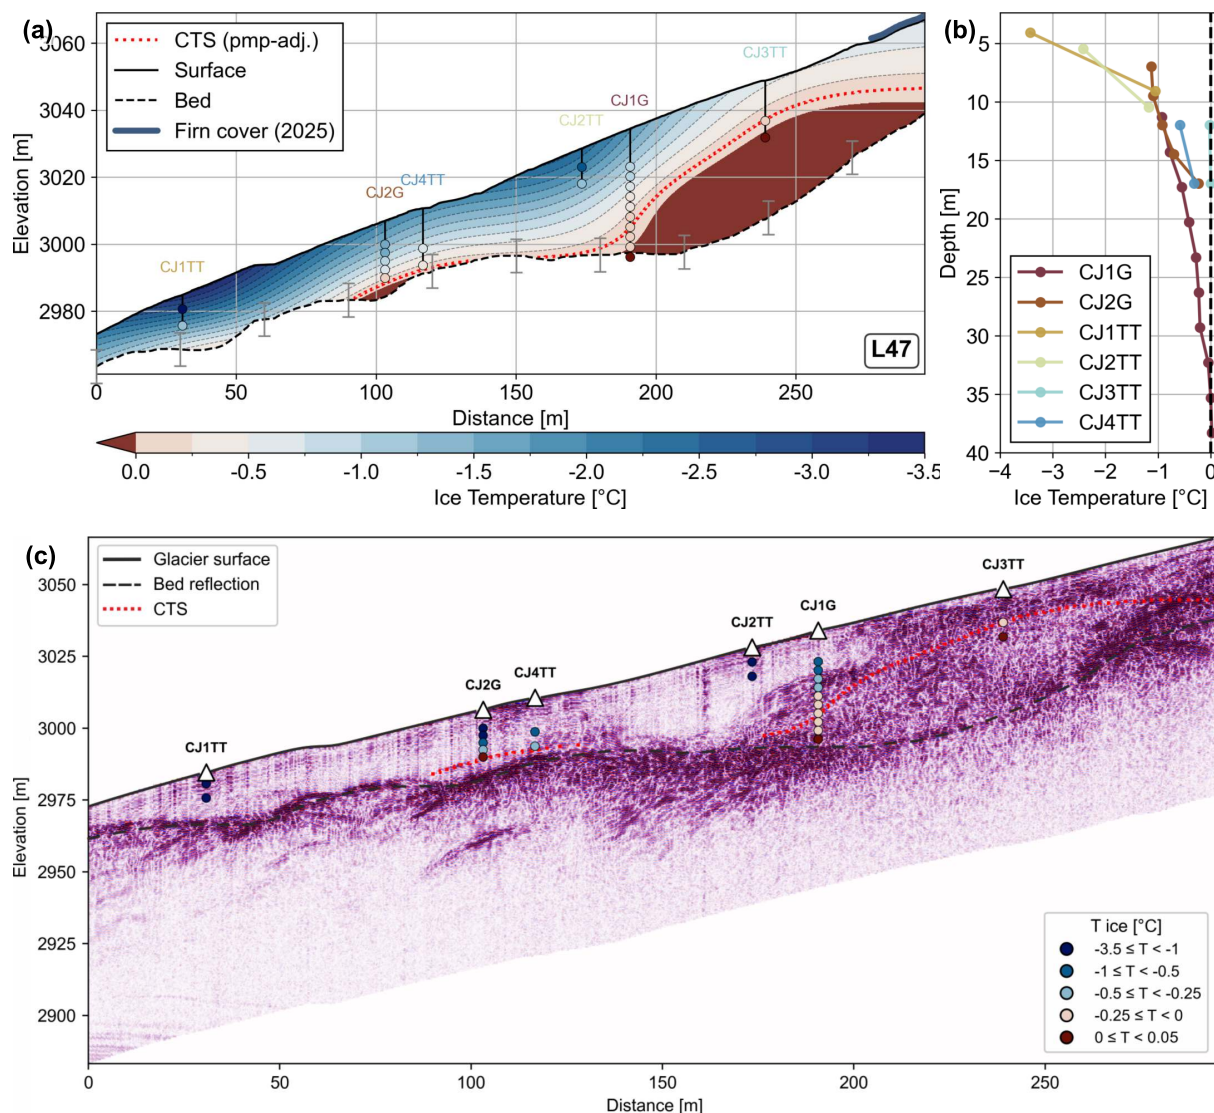

**Figure 7.** Englacial temperature structure and radar reflectivity along Chessjen profile L47 (for profile location, see Fig. 1b). (a) Interpolated englacial temperature field derived from borehole measurements. Temperatures at CJ1G, CJ2G, CJ3TT, and CJ4TT are averaged over the period 08.08.–03.09.2025; CJ1TT and CJ2TT over September 2024–September 2025. Modelled firm cover extent is shown for 2025. In the year 2010 no firm was present at Chessjen. (b) Vertical temperature profiles for all boreholes; the dashed line marks the 0°C isotherm. (c) Depth radargram along profile L47 with borehole positions and the CTS derived from the interpolated temperature field.

Firn-free exposure broadly reflects the thermal state across the six sites, with longer firn-free histories associated with more advanced cooling. The clearest examples are Sex Rouge and Corvatsch, both firn-free for more than three decades, where cold surface conditions prevail throughout the measured depth range. At Sex Rouge, the apparent near-surface warming relative to

340

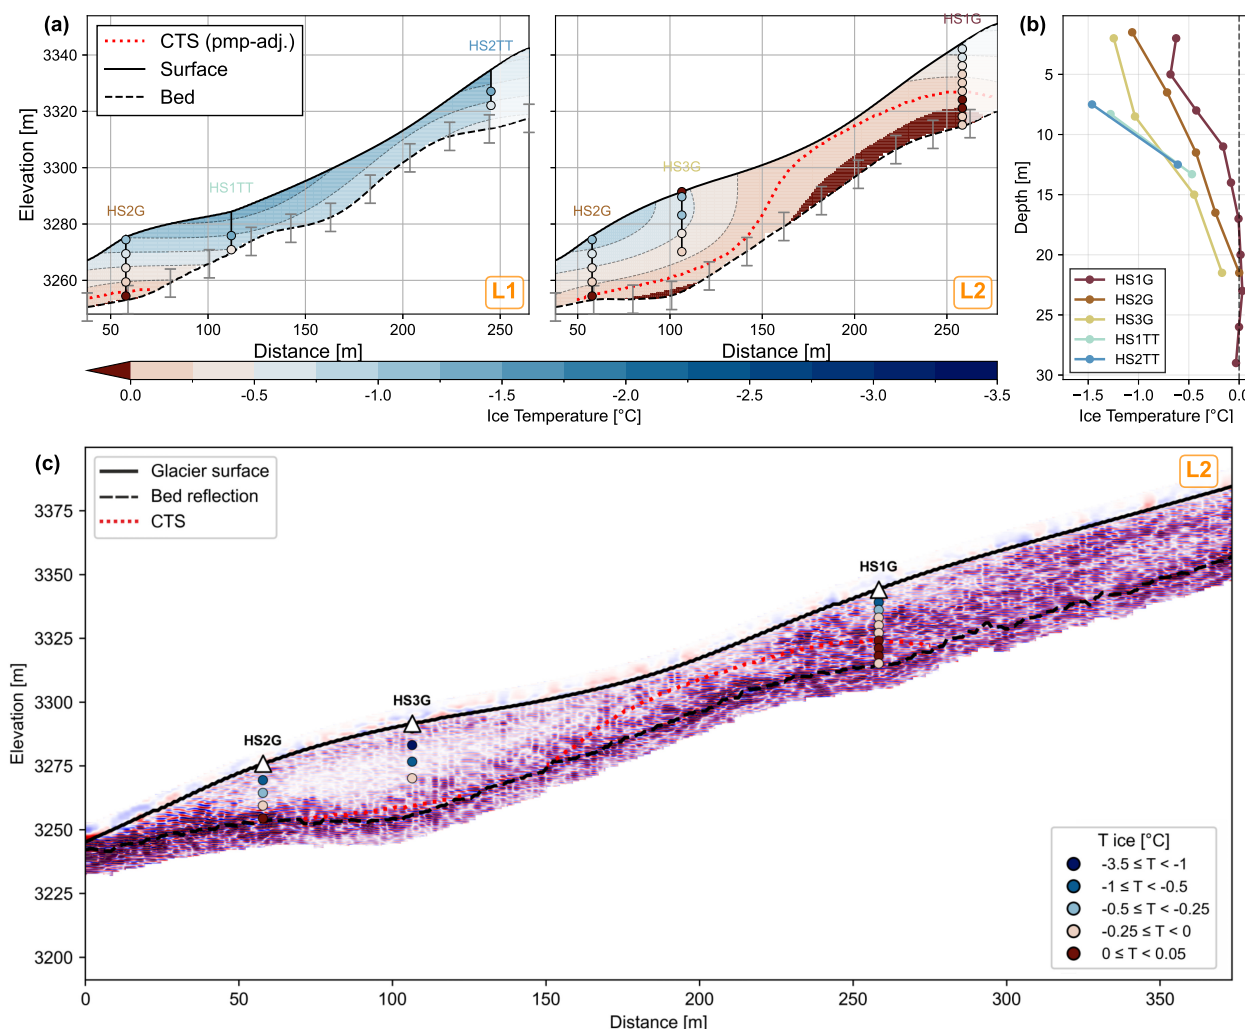

**Figure 8.** Englacial temperature structure and radar reflectivity at Hohnsaas. (a) Interpolated temperature fields along profiles L1 (left) and L2 (right) (for profile location, see Fig. 1c). Temperatures at HS1G, HS2G, and HS3G are averaged over the period 13.08.–27.09.2025; HS1TT and HS2TT over September 2024–September 2025. Whiskers along the bed denote  $\pm 5$  m bedrock-depth uncertainty. (b) Vertical temperature profiles for all boreholes (HS1G, HS2G, HS3G, HS1TT, HS2TT); the dashed line marks the  $0^{\circ}$ C isotherm. (c) Depth radargram along profile L2 with borehole positions and the CTS derived from the interpolated temperature field.

previous measurements (Sect. 4.2) is most plausibly explained by surface ablation removing cold ice from above rather than a genuine change in thermal forcing. At Tortin, where borehole locations have similarly been firn-free for more than 30 years, shallow measurements alone are insufficient to characterise the full thermal structure.

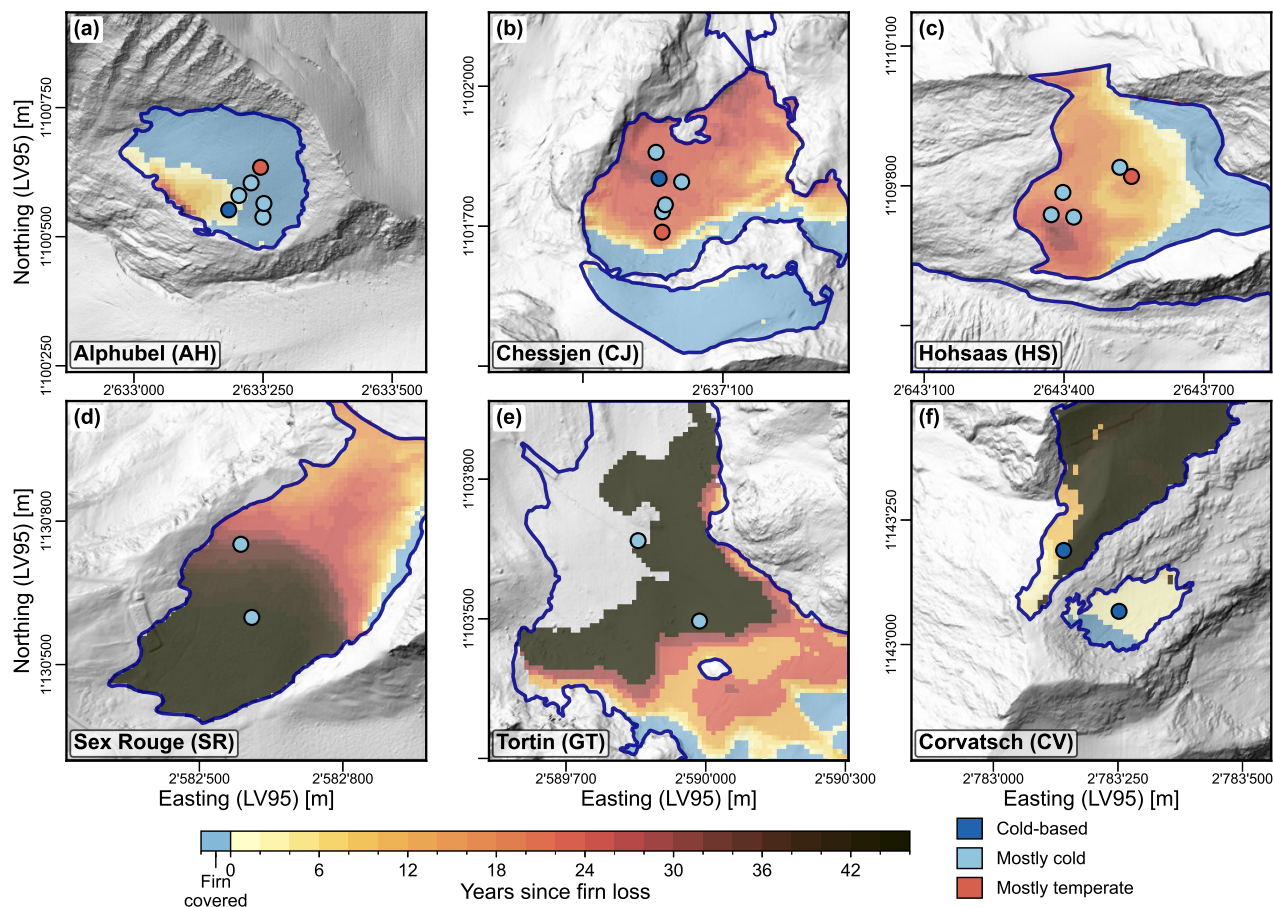

**Figure 9.** Number of years a given area was firm free, mapped across all six study glaciers and draped over a shaded-relief DEM (Swisstopo, 2023). Darker colors indicate longer firm-free periods (prior to 2025). The 2025 firm cover extent is indicated in light blue. Grid cells which have been part of the ablation area over the entire time series (1970-2025) are masked. Borehole colors indicate thermal regime: dark blue = cold-based (entire ice column frozen to the bed); light blue = mostly cold; red = mostly temperate. The blue line marks the SGI2023 outline.

At Chessjen and Hohsaas, the spatial pattern of time since firm loss broadly reflects the glaciers thermal structure, with the CTS deepest in areas that lost firm earliest, suggesting the up-glacier retreat of the firm line has left a spatial imprint on the thermal regime. At both sites, firm-free duration increases down-glacier, ranging from approximately 5-10 years at the uppermost borehole positions to 15-20 years towards the terminus. The persistence of temperate conditions despite firm-free periods of up to a decade at the uppermost borehole positions can be attributed to several factors. First, the thermal diffusion timescale for a temperate layer of 20-30 m thickness may well be on the order of 10-15 years (Cuffey and Paterson, 2010; Gilbert et al., 2012, 2014), meaning the cooling front may only recently have begun to penetrate to the observed CTS depths. Second, meltwater delivery to the firm-free temperate zone has likely not ceased entirely. While the mechanism remains

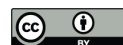

incompletely resolved, bergschrunds and crevasses at both sites provide potential englacial entry points for meltwater draining from the still firn-covered areas above. At Chessjen, the transient temperature jump observed in mid-July (Sect. 4.1) provides indirect support for the notion that such pathways are active.

355 The situation at Alphubel is more nuanced. While the firn-free terminus is cold and the firn-covered upper glacier is temperate, consistent with the pattern seen at Chessjen and Hohsaas, the underlying thermal history likely differs. The largely cold-based terminus is difficult to reconcile with a firn-free period of only 5-7 years, and the cold-temperate-cold vertical structure observed, where a temperate layer is sandwiched between a cold surface layer and a cold bed, suggests a fundamentally different thermal history at this site. Historical imagery from 1930 shows Alphubel as a much thicker hanging glacier with a prominent calving front (Supplementary Fig. S15), a morphology more characteristic of cold or polythermal high-elevation hanging glaciers with limited basal sliding (Gilbert et al., 2015). This is in contrast to the much larger valley glacier systems represented by Chessjen and Hohsaas, as documented in the historical imagery. We therefore interpret the cold terminus as largely predating the current period of firn loss, with the temperate core in the upper glacier representing a relatively recent feature sustained by meltwater percolation from the remaining firn cover above. A similar transition from a cold to a polythermal regime has been documented at Whympfer hanging glacier on the Grande Jorasses south face (Troilo et al., 2022).

#### 4.5 Implications for our understanding of Alpine glacier thermal regimes

The conceptual diagram in Fig. 10 illustrates our interpretation of how the thermal structure of small Alpine glaciers may have evolved in response to climate change and the associated firn cover retreat over the last decades. In the past (e.g., 1980s), the glaciers studied here were likely entirely temperate. Extensive firn cover, sustained by a cooler climate, provided an effective heat source through meltwater percolation and latent heat release upon refreezing. Active glacier dynamics promoted crevassing, creating englacial entry points for meltwater and further supporting temperate conditions throughout the ice column. Greater ice flow velocities also enhanced strain heating, providing an additional internal heat source.

Sustained atmospheric warming has driven firn retreat, progressively reducing latent heat input from meltwater percolation and refreezing. Where firn is lost, meltwater runs off at the surface rather than percolating into the pore space. The associated latent heat release upon refreezing is therefore lost. Simultaneously, ongoing glacier recession reduces ice flow velocities and with it strain heating, while also limiting crevassing and the availability of englacial meltwater pathways. In the absence of firn, both the loss of latent heat from refreezing and the reduced insulation allow the winter cold wave to penetrate the ice surface more effectively, initiating the development of a cold surface layer and, over time, cold ice. **The thermal response to firn loss is neither instantaneous nor spatially uniform. Elevation, topography, residual meltwater supply, and the thermal inertia of the ice all modulate how quickly and how completely cold conditions develop following firn loss.** In some cases, atmospheric warming may already offset the cooling initiated by firn loss, for instance where accelerated surface ablation removes cold ice faster than the winter cold wave can produce it. Alphubel may represent an exception to this thermal history, reminding us of the complexity of thermal responses to climate change. As a high-elevation hanging glacier, it likely harboured cold or polythermal conditions at its terminus even historically, in contrast to Chessjen and Hohsaas which, as much larger valley glacier systems, were likely fully temperate (Supplementary Fig. S15).

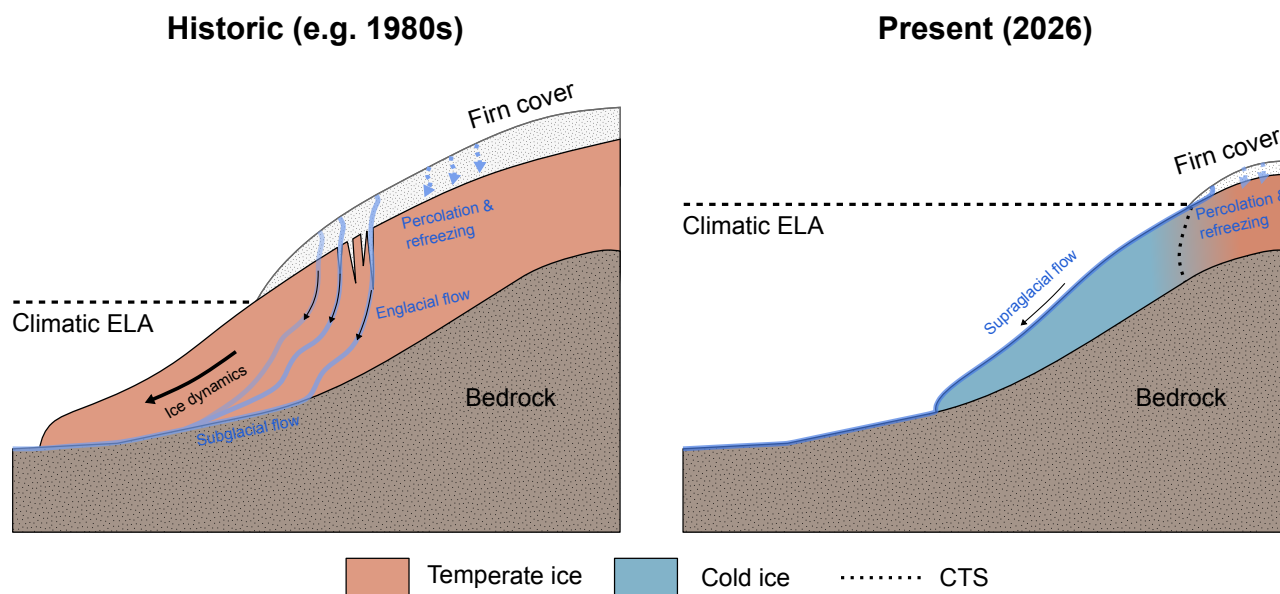

**Figure 10.** Conceptual illustration of the thermal consequences of firn cover loss under glacier recession, comparing the 1980s with present-day (2026) conditions.

The results presented here suggest that polythermal structures may be more widespread among small Alpine glaciers than previously recognised. The existing observational ice temperature record is strongly biased toward larger glaciers (Haeberli, 1976) and high-altitude sites (Haeberli and Alean, 1985; Haeberli and Funk, 1991; Hoelzle et al., 2011), largely overlooking smaller glaciers at lower elevations where firn is progressively being lost and polythermal structures may be actively emerging.

390 Regional-scale thermal modelling, informed by the growing body of englacial temperature observations such as those compiled in the glenglat database (Jacquemart and Welty, 2024) and the records presented here, offers a path toward assessing the current distribution of polythermal structures and projecting their evolution under continued atmospheric warming. Such projections are particularly relevant given the hazard implications of polythermal configurations.

#### 4.6 Possible hazard implications

395 Polythermal glaciers are not dangerous per se. The thermal structures identified in this study are however consistent with a configuration known to promote meltwater accumulation beyond drainage capacity: a frozen terminus combined with a temperate upper glacier. During drilling at Alphubel, the only site with direct evidence for a fully frozen terminus, pressurised water escaped from borehole AH1TT at approximately 15 m depth, producing a water fountain 3 to 5 m high. This indicates that water pressure locally exceeded the ice overburden, implying that meltwater had been trapped sub- or englacially and

400 couldn't drain. If such conditions occur at the glacier bed, basal friction may be substantially reduced locally. A broadly similar configuration, combining a cold glacier tongue with pressurised englacial water, has been discussed in the context of



the 2022 Marmolada collapse (Bondesan and Francese, 2023; Olivieri and Bettanini, 2023). Whether similar configurations exist at other small Alpine glaciers remains unknown, but the number of potentially affected sites may be substantial.

To give a rough sense of how many glaciers share the size and elevation characteristics of our study sites, we filtered the SGI2023 (Huss et al., 2025) for glaciers smaller than 0.5 km<sup>2</sup> within an elevation range of 2900 m a.s.l. to 3800 m a.s.l. The choice of 2900 m a.s.l. as a lower bound roughly excludes elevations where surface ablation dominates over cold ice formation, as suggested by our observations at Sex Rouge. Approximately 515 glaciers in Switzerland meet these criteria, a number that is likely an underestimate, as small hanging glaciers at high elevations are frequently mapped as part of glacier accumulation areas. This underscores the need for a systematic assessment of the thermal structure of small Alpine glaciers and its implications for hazard potential.

## 5 Conclusions

In this study, we presented englacial temperature data for six small glaciers (< 0.5 km<sup>2</sup>) in the Swiss Alps. The observations span an elevation range of 2700 m to 3800 m a.s.l., directly addressing the lack of data in mid- to lower-elevation ablation areas. Our dataset combines borehole thermometry from a total of 23 boreholes with ground-penetrating radar surveys to assess glacier thermal structures.

Polythermal conditions were identified in three glaciers, Alphubel, Chessjen, and Hohsaas, with the CTS occurring at depths of 17 to 38 m. Beneath the cold seasonal layer, ice temperatures ranged from temperate conditions to -2.1 °C. A consistent pattern emerged across these three glaciers, with a generally temperate zone at higher elevations transitioning into fully or partially cold-based glacier termini. However, evidence for a consistently frozen glacier terminus was only found at Alphubel, the highest-elevation glacier in our dataset. At the three additional shallow-drilled sites, Corvatsch appears predominantly cold-based, while Sex Rouge likely retains a polythermal structure with a cold surface layer overlying temperate basal ice (Fischer, 2018), though this remains poorly constrained at depth. At Tortin, sensors were limited to the seasonally influenced surface layer, precluding any assessment of the deeper thermal structure. Our GPR surveys confirmed the spatial thermal patterns inferred from boreholes, with low scattering in cold ice and enhanced scattering in temperate zones. Enhanced near-bed scattering at Chessjen and Hohsaas further suggests that temperate basal conditions may extend beyond what the borehole network resolves.

The fact that three out of six glaciers were confirmed polythermal, with a fourth, likely retaining its historically documented polythermal structure (Fischer, 2018), suggests that this thermal regime may be more widespread among small Alpine glaciers than previously recognised. A systematic regional-scale assessment of their distribution and hazard implications represents an important next step, and our dataset provides essential constraints for the thermal modelling efforts needed to address it.

*Code and data availability.* The source code used to process our data is publicly available on GitHub under [https://github.com/sdrocer/polythermal\\_swiss\\_glaciers](https://github.com/sdrocer/polythermal_swiss_glaciers) (Beer, 2026). The borehole thermometry data has been added to the Global Englacial Temperature database

<https://doi.org/10.5194/egusphere-2026-3042>

Preprint. Discussion started: 16 June 2026

© Author(s) 2026. CC BY 4.0 License.

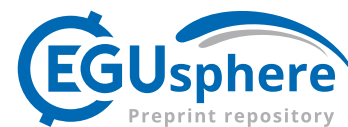

(glenglat) available on github under <https://github.com/mjacqu/glenglat> (Jacquemart and Welty, 2024). The ground based ground-penetrating radar data presented in this study are available in the ETH Research Collection at <https://doi.org/10.3929/ethz-c-000799146> (Beer et al., 435 2026).

## **Appendix A: Borehole Inventory**



**Table A1.** Overview of the boreholes drilled in this study, showing drilling date, borehole coordinates (X, Y; EPSG:2056), elevation (Z), and sensor depth at the time of installation. The borehole ID suffix indicates the sensor type (TT = Tinytag loggers; G = Geoprecision loggers). Boreholes marked with \* reached the bedrock.

| #                           | Borehole ID | Date       | X          | Y          | Z [m a.s.l.] | Depth [m] |
|-----------------------------|-------------|------------|------------|------------|--------------|-----------|
| <b>Alphubel South</b>       |             |            |            |            |              |           |
| 1                           | AH1G*       | 06/08/2025 | 2633226.81 | 1100604.12 | 3802         | 50.6*     |
| 2                           | AH2G*       | 06/08/2025 | 2633183.50 | 1100551.82 | 3759         | 20.3*     |
| 3                           | AH3G*       | 06/08/2025 | 2633245.17 | 1100634.30 | 3820         | 58.3*     |
| 4                           | AH1TT       | 21/08/2024 | 2633249.72 | 1100537.76 | 3775         | 15.0      |
| 5                           | AH2TT       | 21/08/2024 | 2633251.63 | 1100564.25 | 3789         | 14.0      |
| 6                           | AH3TT       | 06/08/2025 | 2633203.23 | 1100579.67 | 3781         | 17.0      |
| <b>Chessjengletscher</b>    |             |            |            |            |              |           |
| 7                           | CJ1G*       | 08/08/2025 | 2636970.56 | 1101731.07 | 3031         | 38.3*     |
| 8                           | CJ2G*       | 08/08/2025 | 2636963.22 | 1101802.26 | 3005         | 17.0*     |
| 9                           | CJ1TT       | 09/08/2024 | 2636956.76 | 1101858.36 | 2983         | 11.8      |
| 10                          | CJ2TT       | 09/08/2024 | 2636976.64 | 1101745.91 | 3027         | 13.5      |
| 11                          | CJ3TT       | 08/08/2025 | 2636969.90 | 1101687.21 | 3046         | 20.0      |
| 12                          | CJ4TT       | 08/08/2025 | 2637011.63 | 1101794.98 | 3004         | 20.0      |
| <b>Hohsaasgletscher</b>     |             |            |            |            |              |           |
| 13                          | HS1G*       | 13/08/2025 | 2643544.74 | 1109819.94 | 3349         | 29.0*     |
| 14                          | HS2G*       | 13/08/2025 | 2643372.47 | 1109737.94 | 3278         | 21.5*     |
| 15                          | HS3G        | 13/08/2025 | 2643420.68 | 1109732.65 | 3292         | 21.5      |
| 16                          | HS1TT       | 08/08/2024 | 2643397.51 | 1109785.68 | 3284         | 15.6      |
| 17                          | HS2TT       | 08/08/2024 | 2643519.71 | 1109839.68 | 3337         | 15.4      |
| <b>Glacier du Sex Rouge</b> |             |            |            |            |              |           |
| 18                          | SR1TT       | 06/08/2024 | 2582609.56 | 1130598.61 | 2787         | 15.3      |
| 19                          | SR2TT       | 06/08/2024 | 2582586.65 | 1130751.59 | 2760         | 14.5      |
| <b>Glacier de Tortin</b>    |             |            |            |            |              |           |
| 20                          | GT1TT       | 07/08/2024 | 2589854.86 | 1103667.77 | 2858         | 9.2       |
| 21                          | GT2TT       | 07/08/2024 | 2589986.76 | 1103495.13 | 2891         | 15.25     |
| <b>Vadret dal Corvatsch</b> |             |            |            |            |              |           |
| 22                          | CV1TT*      | 28/08/2024 | 2783252.23 | 1143066.66 | 3271         | 7.0*      |
| 23                          | CV2TT*      | 28/08/2024 | 2783141.08 | 1143188.93 | 3304         | 9.3*      |



*Author contributions.* Janosch Beer: Conceptualization, Data curation, Formal analysis, Investigation, Project administration, Visualization, Writing – original draft, Writing – review and editing. Mylène Jacquemart: Conceptualization, Supervision, Writing – review and editing. Matthias Huss: Conceptualization, Software (firm cover reconstruction), Supervision, Writing – review and editing. Ilaria Santin: Investigation, Data curation (ground-based GPR post-processing), Writing – review and editing. Gabriela Clara Racz: Investigation, Methodology, Data curation (UAV-based GPR survey and post-processing, Hohsaas), Writing – review and editing. Christophe Ogier: Investigation, Data curation (ground-based GPR post-processing, Alphubel), Writing – review and editing. Saskia Gindraux: Investigation, Financing, Writing – review and editing. Leo Hösli: Investigation, Writing – review and editing. Raphael Moser: Investigation. James Irving: Conceptualization, Methodology, Investigation (UAV-based GPR), Writing – review and editing. Mauro Fischer: Resources (historical englacial temperature data, Sex Rouge), Investigation, Writing – review and editing. Daniel Farinotti: Conceptualization, Investigation, Financing, Supervision, Writing – review and editing.

*Competing interests.* Daniel Farinotti is a member of the editorial board of The Cryosphere. The remaining authors declare that they have no conflict of interest.

*Acknowledgements.* This study draws on an extensive series of field campaigns that would not have been possible without the dedication, support, and hard work of all those who contributed. The first author made use of Claude (Anthropic) as an AI-assisted tool to support language editing and code development. All scientific interpretations, analyses, and conclusions are the sole responsibility of the authors. The first author would like to thank Dominika Teluchová for her personal support throughout this work.

*Financial support.* This study was primarily supported by internal research funds of ETH Zurich and WSL. Fieldwork was additionally supported by the Section of Natural Hazards of the Canton of Valais, Switzerland. Previous borehole temperature measurements at Sex Rouge first published by Fischer (2018) received financial support from the Swiss National Science Foundation (SNSF), grant no. 200021 137586.



## References

- Agassiz, L.: Nouvelles études et expériences sur les glaciers actuels, V. Masson, 1847.
- Ambach, W. and Eisner, H.: Analysis of a 20 m. Firn Pit on the Kesselwandferner (Ötztal Alps), *Journal of Glaciology*, 6, 223–231, 460 <https://doi.org/10.3189/S0022143000019237>, 1966.
- Beer, J.: Code for: Polythermal Conditions in Small Glaciers in the Swiss Alps, 2026.
- Beer, J., Santin, I., and Ogier, C.: GPR Data for Beer et al. 2026: Radar Dataset of Glacier Du Sex Rouge, Glacier de Tortin, Vadret Dal Corvatsch, Alphubel South, Chessjengletscher, Hohaasgletscher, <https://doi.org/10.3929/ethz-c-000799146>, 2026.
- Bondesan, A. and Francese, R. G.: The Climate-Driven Disaster of the Marmolada Glacier (Italy), *Geomorphology*, 431, 108 687, 465 <https://doi.org/10.1016/j.geomorph.2023.108687>, 2023.
- Boon, S. and Sharp, M.: The Role of Hydrologically-Driven Ice Fracture in Drainage System Evolution on an Arctic Glacier, *Geophysical Research Letters*, 30, <https://doi.org/10.1029/2003GL018034>, 2003.
- Cuffey, K. M. and Paterson, W. S. B.: *The Physics of Glaciers*, Academic Press, ISBN 978-0-08-091912-6, 2010.
- Delcourt, C., Van Liefferinge, B., Nolan, M., and Pattyn, F.: The Climate Memory of an Arctic Polythermal Glacier, *Journal of Glaciology*, 470 59, 1084–1092, <https://doi.org/10.3189/2013JoJ12J109>, 2013.
- Faillietaz, J., Funk, M., and Vincent, C.: Avalanching Glacier Instabilities: Review on Processes and Early Warning Perspectives, *Reviews of Geophysics*, 53, 203–224, <https://doi.org/10.1002/2014RG000466>, 2015.
- Fischer, M.: Understanding the Response of Very Small Glaciers in the Swiss Alps to Climate Change, Ph.D. thesis, 2018.
- Flowers, G. E. and Clarke, G. K. C.: A Multicomponent Coupled Model of Glacier Hydrology 1. Theory and Synthetic Examples, *Journal of Geophysical Research: Solid Earth*, 107, ECV 9–1–ECV 9–17, <https://doi.org/10.1029/2001JB001122>, 2002. 475
- Forte, E., Gutgesell, P., Securo, A., Marcer, M., Citterio, M., Machguth, H., and Colucci, R. R.: Comparing GPR with Ice Thickness and Thermal Models: Insights from Two Polythermal Glaciers in West Greenland, *Journal of Glaciology*, 71, e97, <https://doi.org/10.1017/jog.2025.10067>, 2025.
- Gastaldello, M., Mattea, E., Hoelzle, M., and Machguth, H.: Modelling Cold Firn Evolution at Colle Gnifetti, Swiss/Italian Alps, *The Cryosphere*, 19, 2983–3008, <https://doi.org/10.5194/tc-19-2983-2025>, 2025. 480
- Geolix Technologies Inc.: Geolix: Cloud-hosted Platform for GPR Data Visualization and Interpretation, 2020.
- Gilbert, A., Vincent, C., Wagnon, P., Thibert, E., and Rabatel, A.: The Influence of Snow Cover Thickness on the Thermal Regime of Tte Rouse Glacier (Mont Blanc Range, 3200 m a.s.l.): Consequences for Outburst Flood Hazards and Glacier Response to Climate Change, *Journal of Geophysical Research*, 117, <https://doi.org/10.1029/2011JF002258>, 2012.
- 485 Gilbert, A., Gagliardini, O., Vincent, C., and Wagnon, P.: A 3-D Thermal Regime Model Suitable for Cold Accumulation Zones of Polythermal Mountain Glaciers, *Journal of Geophysical Research: Earth Surface*, 119, 1876–1893, <https://doi.org/10.1002/2014JF003199>, 2014.
- Gilbert, A., Vincent, C., Gagliardini, O., Krug, J., and Berthier, E.: Assessment of Thermal Change in Cold Avalanching Glaciers in Relation to Climate Warming, *Geophysical Research Letters*, 42, 6382–6390, <https://doi.org/10.1002/2015GL064838>, 2015.
- 490 Gilbert, A., Leinss, S., Kargel, J., Kääh, A., Gascoïn, S., Leonard, G., Berthier, E., Karki, A., and Yao, T.: Mechanisms Leading to the 2016 Giant Twin Glacier Collapses, Aru Range, Tibet, *The Cryosphere*, 12, 2883–2900, <https://doi.org/10.5194/tc-12-2883-2018>, 2018.
- Gilbert, A., Sinisalo, A., Gurung, T. R., Fujita, K., Maharjan, S. B., Sherpa, T. C., and Fukuda, T.: The Influence of Water Percolation through Crevasses on the Thermal Regime of Himalayan Mountain Glaciers, <https://doi.org/10.5194/tc-2019-172>, 2019.



- GLAMOS - Glacier Monitoring Switzerland: Swiss Glacier Mass Balance (Release 2025), <https://doi.org/10.18750/MASSBALANCE.2025.R2025>,  
495 2025.
- Haerberli, W.: Eistemperaturen in Den Alpen, Verlag nicht ermittelbar, 1976.
- Haerberli, W. and Alean, J.: Temperature and Accumulation of High Altitude Firm in the Alps, *Annals of Glaciology*, 6, 161–163,  
<https://doi.org/10.3189/1985AoG6-1-161-163>, 1985.
- Haerberli, W. and Funk, M.: Borehole Temperatures at the Colle Gnifetti Core-Drilling Site (Monte Rosa, Swiss Alps), *Journal of Glaciology*,  
500 37, 37–46, <https://doi.org/10.3189/S0022143000042775>, 1991.
- Haerberli, W., Frauenfelder, R., Käab, A., and Wagner, S.: Characteristics and Potential Climatic Significance of “Miniature Ice Caps” (Crest-  
and Cornice-Type Low-Altitude Ice Archives), *Journal of Glaciology*, 50, 129–136, <https://doi.org/10.3189/172756504781830330>, 2004.
- Hardy, R. L.: Multiquadric Equations of Topography and Other Irregular Surfaces, <https://doi.org/10.1029/JB076i008p01905>, 1971.
- Heucke, E.: A Light Portable Steam-Driven Ice Drill Suitable for Drilling Holes in Ice and Firm, *Geografiska Annaler. Series A, Physical*  
505 *Geography*, 81, 603–609, 1999.
- Hoelzle, M., Darms, G., Lüthi, M. P., and Suter, S.: Evidence of Accelerated Englacial Warming in the Monte Rosa Area, Switzerland/Italy,  
*The Cryosphere*, 5, 231–243, <https://doi.org/10.5194/tc-5-231-2011>, 2011.
- Huggel, C., Haerberli, W., Käab, A., Bieri, D., and Richardson, S.: An Assessment Procedure for Glacial Hazards in the Swiss Alps, *Canadian*  
*Geotechnical Journal*, 41, 1068–1083, <https://doi.org/10.1139/t04-053>, 2004.
- 510 Hugi, F. J.: Ueber das Wesen der Gletscher und Winterreise in das Eismeer, Gotta’scher Verlag, 1842.
- Huss, M. and Fischer, M.: Sensitivity of Very Small Glaciers in the Swiss Alps to Future Climate Change, *Frontiers in Earth Science*, 4,  
2016.
- Huss, M., Dhulst, L., and Bauder, A.: New Long-Term Mass-Balance Series for the Swiss Alps, *Journal of Glaciology*, 61, 551–562,  
<https://doi.org/10.3189/2015JoG15J015>, 2015.
- 515 Huss, M., Bauder, A., Linsbauer, A., Gabbi, J., Kappenberger, G., Steinegger, U., and Farinotti, D.: More than a Century of Direct Glacier  
Mass-Balance Observations on Claridenfirn, Switzerland, *Journal of Glaciology*, 67, 697–713, <https://doi.org/10.1017/jog.2021.22>, 2021.
- Huss, M., Bauder, A., Hodel, E., and Linsbauer, A.: Swiss Glacier Bulletin 2024: Annual Report #145 on Glacier Observation in Switzerland,  
Tech. rep., GLAMOS - Glacier Monitoring Switzerland, [https://doi.org/10.18752/GLBULLETIN\\_2024](https://doi.org/10.18752/GLBULLETIN_2024), 2025.
- Huss, M., Bauder, A., Barandun, M., Hodel, E., and Linsbauer, A.: Swiss Glacier Bulletin 2025, Tech. rep., GLAMOS - Glacier Monitoring  
520 Switzerland, [https://doi.org/10.18752/GLBULLETIN\\_2025](https://doi.org/10.18752/GLBULLETIN_2025), 2026.
- Irvine-Fynn, T. D. L., Moorman, B. J., Williams, J. L. M., and Walter, F. S. A.: Seasonal Changes in Ground-Penetrating Radar  
Signature Observed at a Polythermal Glacier, Bylot Island, Canada, *Earth Surface Processes and Landforms*, 31, 892–909,  
<https://doi.org/10.1002/esp.1299>, 2006.
- Irvine-Fynn, T. D. L., Hodson, A. J., Moorman, B. J., Vatne, G., and Hubbard, A. L.: Polythermal Glacier Hydrology: A Review, *Reviews*  
525 *of Geophysics*, 49, <https://doi.org/10.1029/2010RG000350>, 2011.
- Jacquemart, M. and Welty, E.: Glenglat: A Database of Global Englacial Temperatures, *Earth System Science Data Discussions*, pp. 1–47,  
<https://doi.org/10.5194/essd-2024-249>, 2024.
- Jacquemart, M., Loso, M., Leopold, M., Welty, E., Berthier, E., Hansen, J. S., Sykes, J., and Tiampo, K.: What Drives Large-Scale Glacier  
Detachments? Insights from Flat Creek Glacier, St. Elias Mountains, Alaska, *Geology*, 48, 703–707, <https://doi.org/10.1130/G47211.1>,  
530 2020.



- Jacquemart, M., Weber, S., Chiarle, M., Chmiel, M., Cicoira, A., Corona, C., Eckert, N., Gaume, J., Giacona, F., Hirschberg, J., Kaitna, R., Magnin, F., Mayer, S., Moos, C., van Herwijnen, A., and Stoffel, M.: Detecting the Impact of Climate Change on Alpine Mass Movements in Observational Records from the European Alps, *Earth-Science Reviews*, 258, 104 886, <https://doi.org/10.1016/j.earscirev.2024.104886>, 2024.
- 535 Jansson, P.: Dynamics and Hydrology of a Small Polythermal Valley Glacier, *Geografiska Annaler: Series A, Physical Geography*, 78, 171–180, <https://doi.org/10.1080/04353676.1996.11880463>, 1996.
- Kääb, A., Leinss, S., Gilbert, A., Bühler, Y., Gascoïn, S., Evans, S. G., Bartelt, P., Berthier, E., Brun, F., Chao, W.-A., Farinotti, D., Gimbert, F., Guo, W., Huggel, C., Kargel, J. S., Leonard, G. J., Tian, L., Treichler, D., and Yao, T.: Massive Collapse of Two Glaciers in Western Tibet in 2016 after Surge-like Instability, *Nature Geoscience*, 11, 114–120, <https://doi.org/10.1038/s41561-017-0039-7>, 2018.
- 540 Karlsson, N. B., Solgaard, A. M., Mankoff, K. D., Gillet-Chaulet, F., MacGregor, J. A., Box, J. E., Citterio, M., Colgan, W. T., Larsen, S. H., Kjeldsen, K. K., Korsgaard, N. J., Benn, D. I., Hewitt, I. J., and Fausto, R. S.: A First Constraint on Basal Melt-Water Production of the Greenland Ice Sheet, *Nature Communications*, 12, 3461, <https://doi.org/10.1038/s41467-021-23739-z>, 2021.
- Karuš, J., Lamsters, K., Sobota, I., Ješkns, J., Džeriš, P., and Hodson, A.: Drainage System and Thermal Structure of a High Arctic Polythermal Glacier: Waldemarbreen, Western Svalbard, *Journal of Glaciology*, 68, 591–604, <https://doi.org/10.1017/jog.2021.125>, 2022.
- 545 Kavanaugh, J. L. and Clarke, G. K. C.: Abrupt Glacier Motion and Reorganization of Basal Shear Stress Following the Establishment of a Connected Drainage System, *Journal of Glaciology*, 47, 472–480, <https://doi.org/10.3189/172756501781831972>, 2001.
- Law, R., Christoffersen, P., Hubbard, B., Doyle, S. H., Chudley, T. R., Schoonman, C. M., Bougamont, M., des Tombe, B., Schilperoort, B., Kechavarzi, C., Booth, A., and Young, T. J.: Thermodynamics of a Fast-Moving Greenlandic Outlet Glacier Revealed by Fiber-Optic Distributed Temperature Sensing, *Science Advances*, 7, eabe7136, <https://doi.org/10.1126/sciadv.abe7136>, 2021.
- 550 **Mattea, E.: Measuring and Modelling Changes in the Firn at Colle Gnifetti, 4400 m a.s.l., Swiss Alps, Ph.D. thesis, University of Fribourg, Fribourg, 2020.**
- Medici, F. and Rybach, L.: Geothermal Map of Switzerland 1995 (Heat Flow Density), Tech. Rep. 30, Commission Suisse de Géophysique, Zurich, Switzerland, 1995.
- Oerlemans, J.: A Note on the Water Budget of Temperate Glaciers, *The Cryosphere*, 7, 1557–1564, <https://doi.org/10.5194/tc-7-1557-2013>, 555 2013.
- Olivieri, L. and Bettanini, C.: Preliminary Observation of Marmolada Glacier Collapse of July 2022 with Space-Based Cameras, *Remote Sensing Letters*, 14, 21–29, <https://doi.org/10.1080/2150704X.2022.2152754>, 2023.
- Pettersson, R., Jansson, P., and Blatter, H.: Spatial Variability in Water Content at the Cold-Temperate Transition Surface of the Polythermal Storglaciären, Sweden, *Journal of Geophysical Research: Earth Surface*, 109, <https://doi.org/10.1029/2003JF000110>, 2004.
- 560 Raspoet, O. and Pattyn, F.: Estimates of Basal and Englacial Thermal Conditions of the Antarctic Ice Sheet, *Journal of Glaciology*, 71, e104, <https://doi.org/10.1017/jog.2025.10087>, 2025.
- Röthlisberger, H.: Eislawinen und Ausbrüche von Gletscherseen, 1978.
- Ruols, B., Baron, L., and Irving, J.: Development of a Drone-Based Ground-Penetrating Radar System for Efficient and Safe 3D and 4D Surveying of Alpine Glaciers, *Journal of Glaciology*, 69, 2087–2098, <https://doi.org/10.1017/jog.2023.83>, 2023.
- 565 Sevestre, H., Benn, D. I., Hulton, N. R. J., and Bælum, K.: Thermal Structure of Svalbard Glaciers and Implications for Thermal Switch Models of Glacier Surging, *Journal of Geophysical Research: Earth Surface*, 120, 2220–2236, <https://doi.org/10.1002/2015JF003517>, 2015.



- Suter, S. and Hoelzle, M.: Cold Firn in the Mont Blanc and Monte Rosa Areas, European Alps: Spatial Distribution and Statistical Models, *Annals of Glaciology*, 35, 9–18, <https://doi.org/10.3189/172756402781817059>, 2002.
- 570 Swisstopo: SWISSALTI3D – The Digital Elevation Model of Switzerland, <https://www.swisstopo.admin.ch>, 2023.
- Swisstopo: SWISSIMAGE: Orthophoto Mosaic of Switzerland, 2024.
- Troilo, F., Paolo, P., Gottardelli, S., Mondardini, L., Giordan, D., Dematteis, N., Piard, L., Gagliardini, O., Gilbert, A., and Vincent, C.: Basal Thermal Regime Investigations at Whymper Hanging Glacier (Aosta Valley &ndash; Italy), Tech. Rep. EGU22-7208, Copernicus Meetings, <https://doi.org/10.5194/egusphere-egu22-7208>, 2022.
- 575 van Pelt, W. J. J., Pohjola, V. A., and Reijmer, C. H.: The Changing Impact of Snow Conditions and Refreezing on the Mass Balance of an Idealized Svalbard Glacier, *Frontiers in Earth Science*, 4, <https://doi.org/10.3389/feart.2016.00102>, 2016.
- Vincent, C., Desclotres, M., Garambois, S., Legchenko, A., Guyard, H., and Gilbert, A.: Detection of a Subglacial Lake in Glacier de Tête Rousse (Mont Blanc Area, France), *Journal of Glaciology*, 58, 866–878, <https://doi.org/10.3189/2012JoG11J179>, 2012.
- Vincent, C., Gilbert, A., Jourdain, B., Piard, L., Ginot, P., Mikhalenko, V., Possenti, P., Le Meur, E., Laarman, O., and Six, D.: Strong  
580 Changes in Englacial Temperatures despite Insignificant Changes in Ice Thickness at Dôme Du Goûter Glacier (Mont Blanc Area), *The Cryosphere*, 14, 925–934, <https://doi.org/10.5194/tc-14-925-2020>, 2020.
- Virtanen, P., Gommers, R., Oliphant, T. E., Haberland, M., Reddy, T., Cournapeau, D., Burovski, E., Peterson, P., Weckesser, W., Bright, J., van der Walt, S. J., Brett, M., Wilson, J., Millman, K. J., Mayorov, N., Nelson, A. R. J., Jones, E., Kern, R., Larson, E., Carey, C. J., Polat, İ., Feng, Y., Moore, E. W., VanderPlas, J., Laxalde, D., Perktold, J., Cimrman, R., Henriksen, I., Quintero, E. A., Harris, C. R., Archibald,  
585 A. M., Ribeiro, A. H., Pedregosa, F., and van Mulbregt, P.: SciPy 1.0: Fundamental Algorithms for Scientific Computing in Python, *Nature Methods*, 17, 261–272, <https://doi.org/10.1038/s41592-019-0686-2>, 2020.
- Wadham, J. L., Hodgkins, R., Cooper, R. J., and Tranter, M.: Evidence for Seasonal Subglacial Outburst Events at a Polythermal Glacier, Finsterwalderbreen, Svalbard, *Hydrological Processes*, 15, 2259–2280, <https://doi.org/10.1002/hyp.178>, 2001.
- Wilson, N. J. and Flowers, G. E.: Environmental Controls on the Thermal Structure of Alpine Glaciers, *The Cryosphere*, 7, 167–182,  
590 <https://doi.org/10.5194/tc-7-167-2013>, 2013.
- Wilson, N. J., Flowers, G. E., and Mingo, L.: Comparison of Thermal Structure and Evolution between Neighboring Subarctic Glaciers, *Journal of Geophysical Research: Earth Surface*, 118, 1443–1459, <https://doi.org/10.1002/jgrf.20096>, 2013.

# **Supporting information for: Polythermal conditions in small glaciers in the Swiss Alps**

Janosch Beer<sup>1,2</sup>, Mylène Jacquemart<sup>1,2</sup>, Matthias Huss<sup>1,2,6</sup>, Ilaria Santin<sup>1,2</sup>, Gabriela Clara Racz<sup>3</sup>,  
Christophe Ogier<sup>1,2</sup>, Saskia Gindraux<sup>4</sup>, Leo Hösli<sup>1,2</sup>, Raphael Moser<sup>1,2</sup>, James Irving<sup>3</sup>, Mauro Fischer<sup>5,7</sup>,  
and Daniel Farinotti<sup>1,2</sup>

<sup>1</sup>Laboratory of Hydraulics, Hydrology and Glaciology (VAW), ETH Zurich, Zurich, Switzerland

<sup>2</sup>Swiss Federal Institute for Forest, Snow and Landscape Research (WSL), bâtiment ALPOLE, Sion, Switzerland

<sup>3</sup>University of Lausanne, Institute of Earth Sciences, Lausanne, Switzerland

<sup>4</sup>Centre de recherche sur l'environnement alpin (CREALP), Sion, Switzerland

<sup>5</sup>Institute of Geography, University of Bern, Bern, Switzerland

<sup>6</sup>Department of Geosciences, University of Fribourg, Fribourg, Switzerland

<sup>7</sup>Oeschger Centre for Climate Change Research, University of Bern, Bern, Switzerland

## **Contents of this file**

This supplement follows the structure of the main paper and provides additional figures and tables supporting the methods, field installations, and results described therein.

## 1 Englacial temperature observations

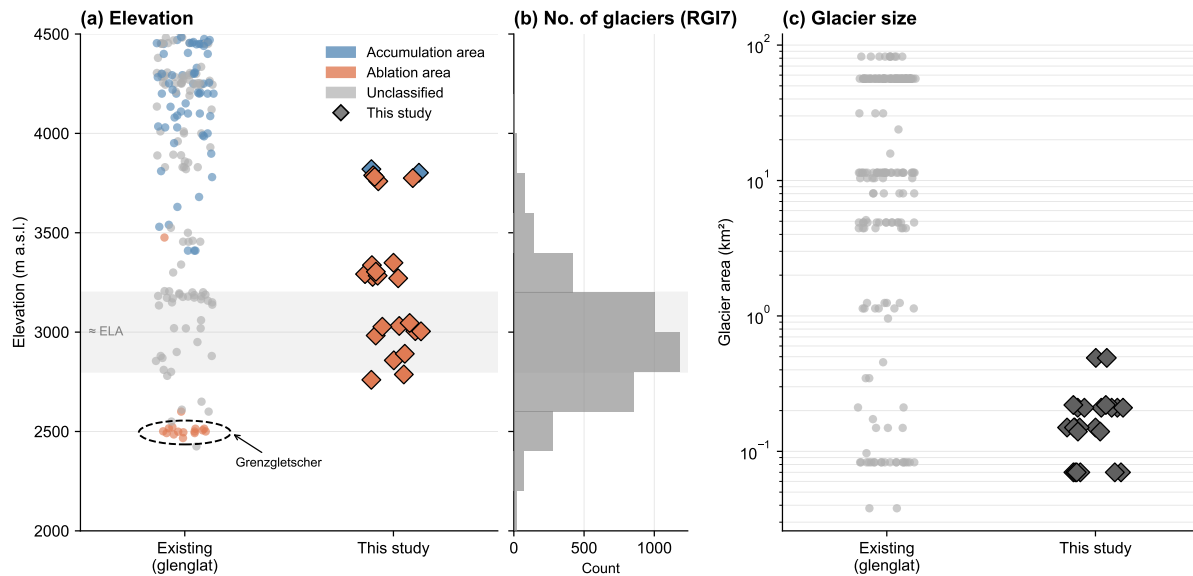

**Figure S1.** Observational bias in Alpine englacial temperature measurements. (a) Borehole elevations in glenglat (Jacquemart and Welty, 2024) and this study, the colour indicates ablation or accumulation area; the dashed ellipse marks Grenzgletscher, which accounts for nearly all measurements declared as ablation-area measurements. (b) RGI7 region 11 glacier elevation distribution (RGI Consortium, 2023). (c) Glacier area of instrumented glaciers.

## 5 2 Methods and instrumentation

### 2.1 Drilling equipment

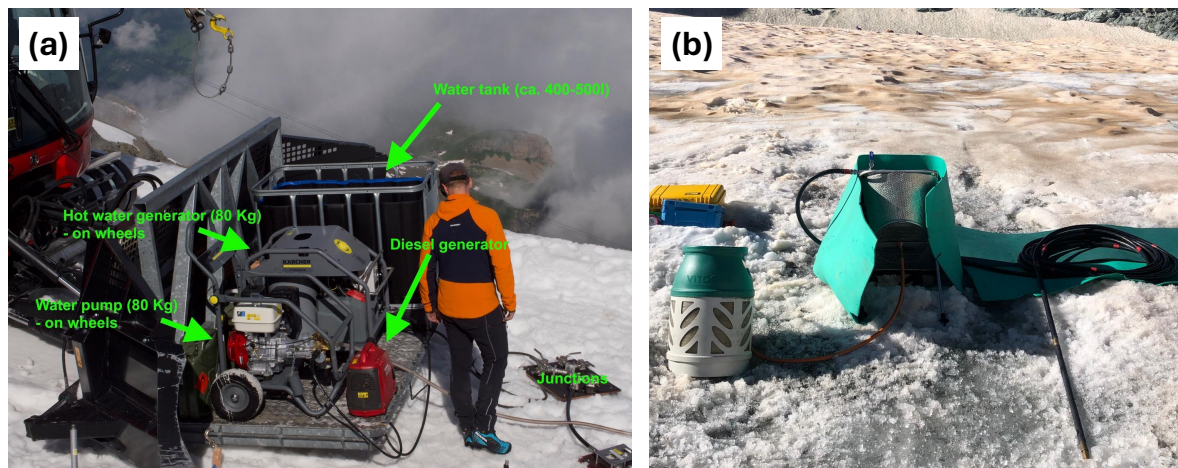

**Figure S2.** Drilling equipment used in this study. (a) Kärcher hot-water drilling unit comprising water tank, diesel heater, pump and hose. The system is capable of delivering water at approximately 80°C through a 2 m rigid metal drill stem. (b) Lightweight portable Heucke steam drill usable as a backpack (Heucke, 1999).

## 2.2 Borehole instrumentation

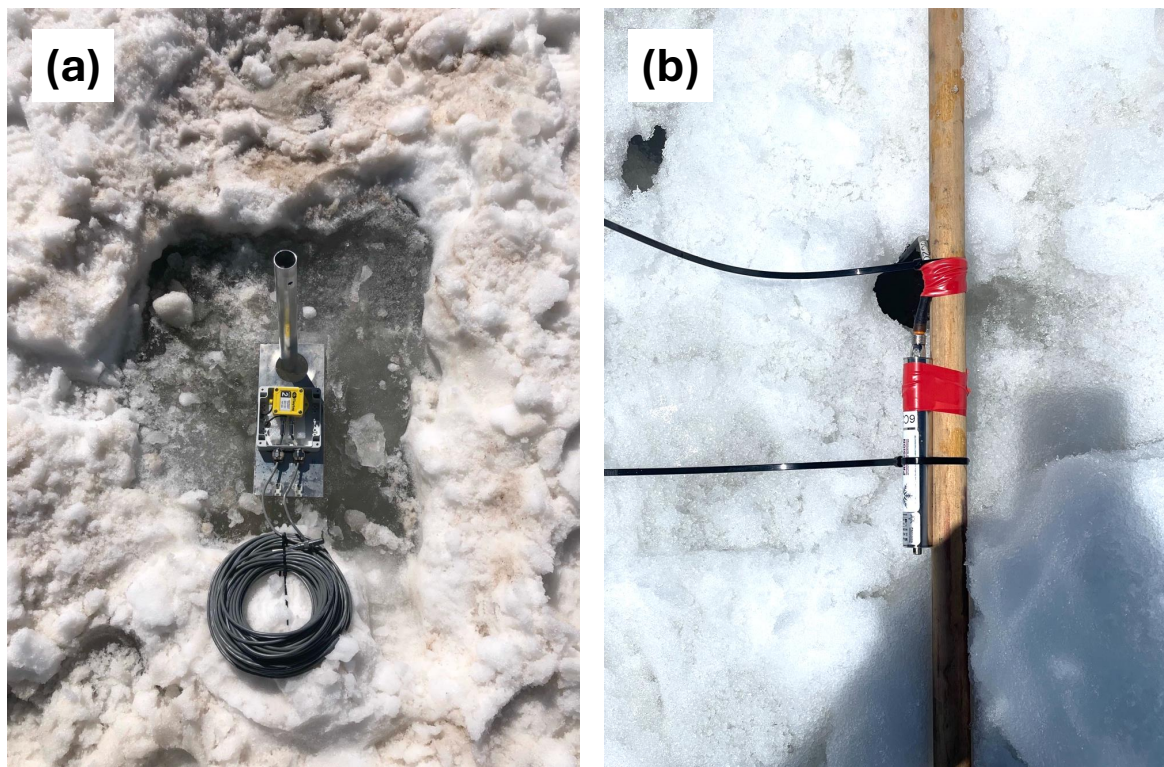

**Figure S3.** Borehole instrumentation used in this study. (a) Shallow boreholes were equipped with a Tinytag Plus 2 (TGP-4520) logger connected to two thermistors, typically placed at 10 and 15 m depth. The logger was housed in a weatherproof logger box mounted on an aluminium plate attached to an ablation stake. (b) Deep boreholes were instrumented with Geoprecision TNode HD thermistor chains containing multiple sensors. The chain logger was fixed to a 1-m wooden stick placed across the borehole top.

### 2.3 Thermistor calibration

All thermistors were calibrated prior to field deployment to correct for sensor-specific offsets relative to 0 °C. Calibration consisted of submerging the sensors in a temperature-controlled bath for approximately two hours to ensure thermal equilibration. To identify stable periods in the recorded signal, rolling statistics were computed from the temperature time series. For a time series  $x_1, x_2, \dots, x_N$ , the rolling mean and standard deviation at time  $t$  using a window size  $w$  are defined as

$$\mu_t = \frac{1}{w} \sum_{i=t-w+1}^t x_i, \quad t \geq w, \quad (1)$$

$$\sigma_t = \sqrt{\frac{1}{w} \sum_{i=t-w+1}^t (x_i - \mu_t)^2}, \quad t \geq w. \quad (2)$$

A period was classified as thermally stable when  $\sigma_t < 0.1$  °C, and the rolling mean over this interval ( $w = 10$  samples, corresponding to 300 s) was taken as the calibration offset for each sensor.

Tinytag thermistors were calibrated using an ice-bath setup at 0 °C (Fig. S4a). A Geoprecision thermistor (accuracy  $\pm 0.05$  °C) submerged simultaneously served as a reference and showed only minor deviations from 0 °C. Geoprecision chains were calibrated in a temperature-controlled alcohol bath (Huber CC245 WL), with an ISOTECH F250 high-precision thermometer (accuracy  $\pm 0.01$  °C) as an external reference, providing the most precise calibration applied in this study.

The median offset is 0.302 °C for the Tinytag sensors and  $-0.004$  °C for the Geoprecision sensors (Fig. S5). One extreme offset of 5.95 °C was identified for the Tinytag logger eventually deployed at borehole GT2TT on Glacier de Tortin. After consultation with the manufacturer, this anomaly was attributed to water infiltration into the logger housing. This sensor was consequently excluded from further analysis, and no englacial temperature data are available for GT2TT. The remaining Tinytag offsets range from 0.19 to 1.17 °C, while the Geoprecision offsets fall within a much narrower range of  $-0.182$  to 0.121 °C.

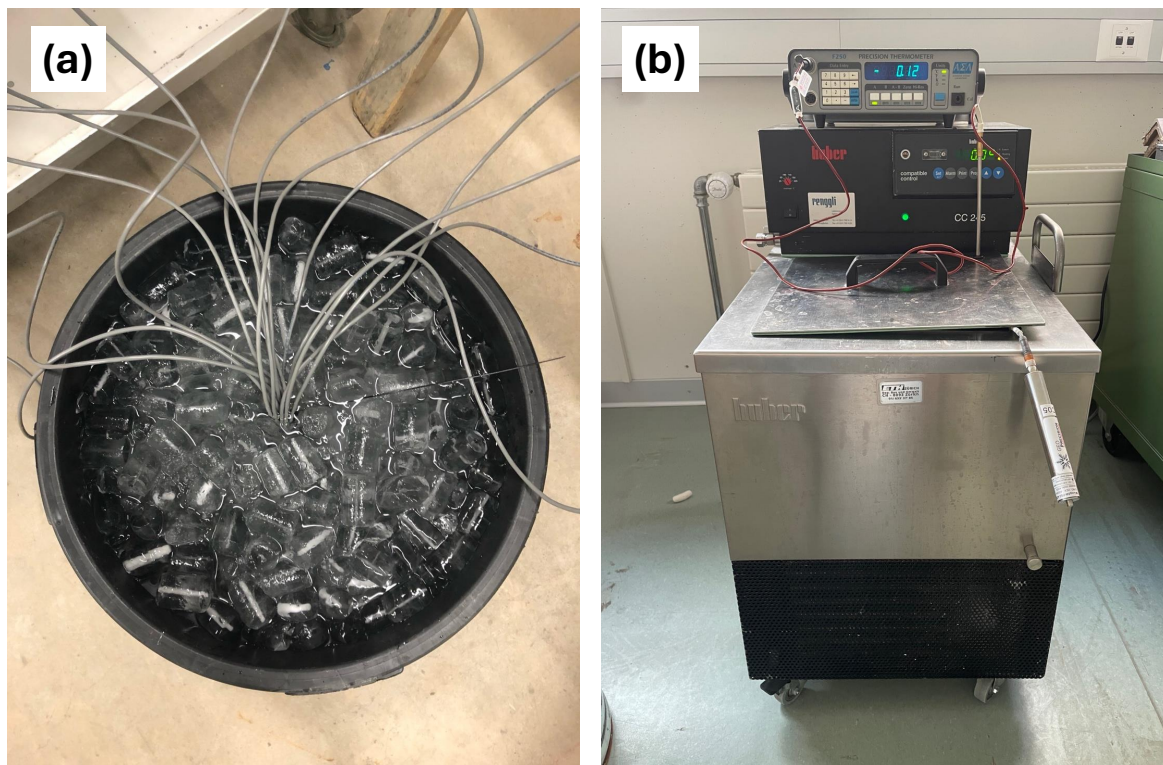

**Figure S4.** Temperature-controlled baths used for calibrating thermistor sensors prior to field deployment. (a) Ice bath used to determine 0 °C offsets for Tinytag thermistors. (b) Alcohol bath (Huber CC245 WL) and high-precision thermometer (ISOTECH F250) used to determine 0 °C offsets for Geoprecision thermistors.

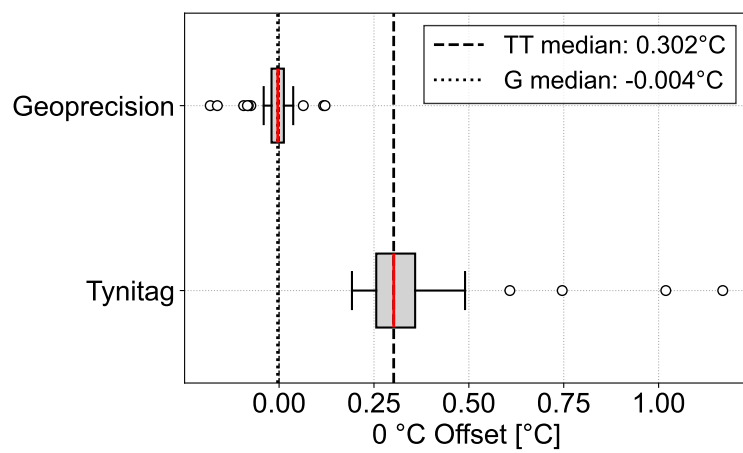

**Figure S5.** Distribution of calculated 0 °C offsets for the Geoprecision (dotted) and Tinytag (dashed) thermistors.

## 2.4 Englacial temperature interpolation

Borehole temperature data were interpolated to a continuous two-dimensional field along glacier profiles using Radial Basis Function (RBF) interpolation (Hardy, 1971), implemented via the `RBFInterpolator` routine of the SciPy library (Virtanen et al., 2020). The RBF uses a multiquadric kernel ( $\phi(r) = \sqrt{r^2 + \epsilon^2}$ ), where  $r$  is the Euclidean distance between two points in the scaled coordinate space and  $\epsilon$  is a shape parameter controlling the width of the basis functions, set to its default value of 1.

For each borehole  $j$ , the vertical elevation of thermistor probe  $k$  is

$$z_{j,k} = z_{s,j} - d_{j,k}, \quad (3)$$

where  $d_{j,k}$  is the sensor depth and  $z_{s,j}$  is the surface elevation at the borehole. Temperature at arbitrary points  $(x, z)$  is estimated as

$$T(x, z) = \sum_{m=1}^M \lambda_m \phi(\|\mathbf{p}_m - (x, wz)\|), \quad (4)$$

where  $M$  is the total number of measurement points,  $\lambda_m$  are weights determined by fitting the RBF to the observations, and  $\mathbf{p}_m = (x_m, wz_m)$  are the coordinate-scaled positions of each measurement. Distances are computed as

$$\|\mathbf{p}_m - (x, wz)\| = \sqrt{(x_m - x)^2 + (wz_m - wz)^2}. \quad (5)$$

The vertical coordinate is scaled by a factor  $w > 1$  to reflect the stronger vertical than horizontal temperature gradients characteristic of glacier ice (Cuffey and Paterson, 2010). The scaling factor was empirically set to  $w = 2.5$ . The interpolated field was evaluated on a regular grid spanning the glacier cross-section and masked to the glacier geometry.

## 2.5 Cold-temperate transition surface detection

The position of the cold-temperate transition surface (CTS) was identified as the boundary between grid cells where the interpolated temperature reached the local pressure melting point and those where it remained below. The melting point depression follows the Clausius-Clapeyron relation:

$$T_m(d) = -\beta \cdot d, \quad (6)$$

where  $T_m$  is the melting point ( $^{\circ}\text{C}$ ),  $d$  is the depth below the surface (m), and  $\beta = 8.7 \times 10^{-4} \text{ }^{\circ}\text{C m}^{-1}$  is the pressure-melting coefficient for air-saturated ice (Cuffey and Paterson, 2010). The depth at elevation  $z$  and horizontal position  $x$  is:

$$h(x, z) = z_s(x) - z, \quad (7)$$

where  $z_s(x)$  is the surface elevation at horizontal location  $x$ . Grid cells were flagged as temperate where the interpolated temperature satisfied:

$$|T(x, z) - T_m(h)| \leq \delta_{\text{CTS}}, \quad (8)$$

where  $\delta_{\text{CTS}} = 0.05 \text{ }^{\circ}\text{C}$ .

## 2.6 Depth of zero annual amplitude

The depth of zero annual amplitude (ZAA) marks the depth below which seasonal temperature fluctuations become negligible (here defined as variations  $< 0.05$  °C). To estimate the ZAA from the Tinytag borehole records, we computed the seasonal amplitude at each sensor as the 2nd–98th percentile range of the measured time series, excluding short-lived transient signals  
60 such as refreezing meltwater events. We then fitted an exponential decay function

$$A(z) = A_0 \exp\left(-\frac{z}{d}\right) \quad (9)$$

to the amplitude-depth pairs using least-squares regression, where  $A_0$  is the surface amplitude and  $d$  is the characteristic decay depth, both determined from the fit. The ZAA was then defined as the depth at which the fitted amplitude falls below 0.05 °C. For glaciers where the deepest sensor exhibited amplitudes exceeding the 0.3 °C threshold, the ZAA could not be reliably  
65 constrained from the available data and is not reported.

## 2.7 Ground-penetrating radar and ice thickness

Two pulse-based GPR systems were used in this study (Fig. S6): a ground-based system deployed at all sites (100 MHz for all glaciers except Alphubel where we used a 250 MHz center frequency), and an uncrewed aerial vehicle (UAV)-based system (80 MHz center frequency) used at Hohnsaasgletscher (Ruols et al., 2023). Each system required a dedicated processing workflow,  
70 described in the following sections.

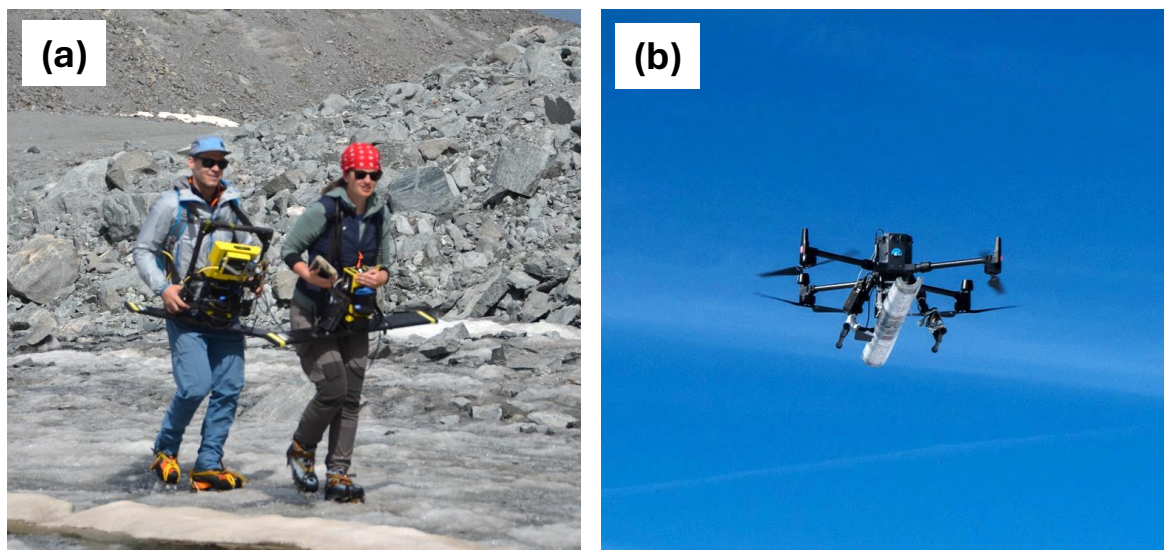

**Figure S6.** GPR systems used in this study. (a) Ground-based system, carried either on foot or on a sledge. (b) UAV-based system as developed by Ruols et al. (2023).

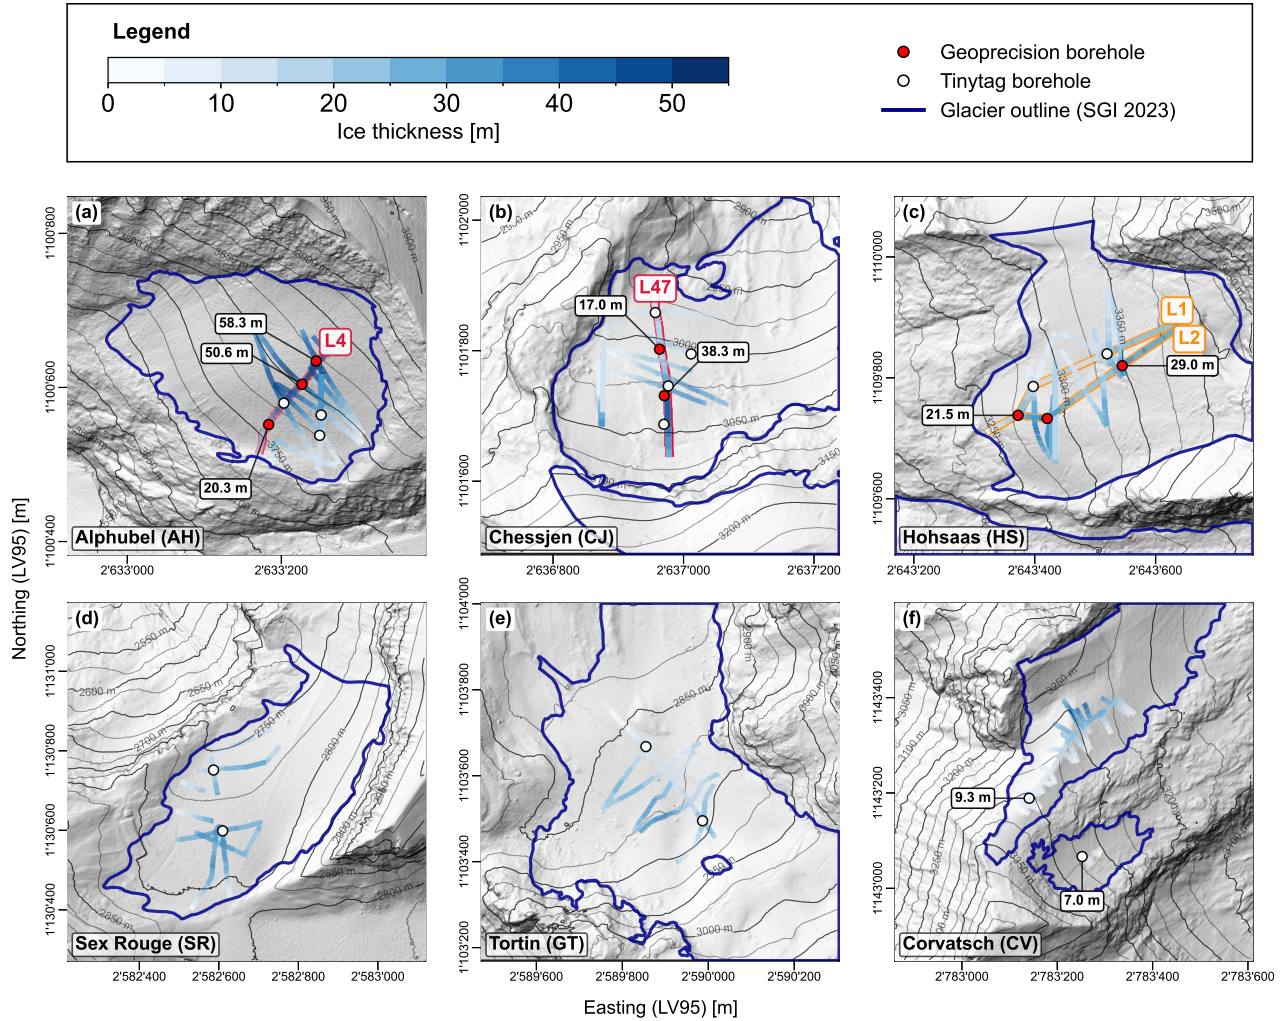

**Figure S7.** GPR survey profiles coloured by measured ice thickness, draped over a shaded-relief DEM (Swisstopo, 2023) for (a) Alphubel, (b) Chessjen, (c) Hohsaas (L1 and L2 derived from UAV-based GPR), (d) Sex Rouge, (e) Tortin, and (f) Corvatsch. Profiles used for subsequent ice-temperature interpolation are marked in red/orange. Borehole locations are distinguished by manufacturer (Geoprecision, Tinytag). Boreholes that reached the glacier bed are annotated with the measured drilling depth.

### 2.7.1 Ground-based GPR processing

A standard processing flow was applied to all ground-based GPR data using the cloud-based Geolix software (Geolix Technologies Inc., 2020):

1. time zero correction based on the direct wave arrival,
- 75 2. background noise removal , performed by average trace subtraction over a trace window of the entire recorded time window,
3. Butterworth band-pass filtering (50–200 MHz),
4. trace binning at 0.02 m spatial sampling,
5. surface reflection picking and elevation referencing, where the picked first arrival was used to tie each trace to the antenna  
80 elevation measured by the differential GNSS at the corresponding position,
6. manual time-varying gain function, with an approximately exponential increase with two-way travel times, and
7. imaging and time-to-depth conversion by Kirchhoff migration, assuming a constant radar wave speed in ice of 0.168 m/ns.

### 2.7.2 UAV-based GPR processing

85 The UAV-based GPR data from Hohsaas were processed using a customized workflow, adapted from Ruols et al. (2023), to produce a 3D data cube imaged in depth. The workflow involved the following steps:

1. Synchronization and positioning: GPR traces (acquired at 14 Hz) were synchronized with high-precision RTK GNSS data (acquired at 5 Hz) using common GPS time. Individual trace coordinates were corrected for the static offset between the GNSS and GPR antennas, and were adjusted for the drone pitch, roll, and yaw to determine the precise measurement  
90 locations of the GPR antenna center.
2. Signal processing and binning: Basic signal processing included (i) a time-zero correction to align the first arrival with the transmitter fire time, (ii) early signal muting to suppress high-amplitude energy associated with the direct pulse, (iii) mean trace removal using a 30-trace sliding window to eliminate system ringing, and (iv) de-wow filtering to remove low-frequency transients using a 15-point residual median filter in time. The data were then binned onto a regular grid  
95 having an along-line spacing of 0.4 m and an across-line spacing of 4 m.
3. Alignment: To correct for small differences in UAV height between adjacent GPR profiles and conform the data to a smooth acquisition surface, static corrections were applied to each trace using a Fourier phase shift. To correct for the effects of internal timing delays specific to the UAV-based GPR system, a cross-correlation-based shift was used to align adjacent odd- and even-numbered flight lines.

- 100 4. 3D Migration: Prior to migration, the data were densified to a 2 m across-line spacing using 3D linear interpolation to reduce directional sampling bias. **Imagine** and time-to-depth conversion was performed using 3D topographic Kirchhoff migration (?). A two-layer velocity model was assumed, consisting of an upper air layer ( $v = 0.3$  m/ns) and a lower glacier ice layer ( $v = 0.168$  m/ns).
- 105 5. Modeling glacier geometry: We reconstructed the 3D glacier geometry to provide the geometric framework required for thermal interpolation. First, the basal bedrock reflections were manually picked along 91 binned along-line profiles. These picks were then interpolated into a continuous 3D bedrock surface using locally weighted scatterplot smoothing called lowess (?) with span = 0.02. The glacier surface model was generated by subtracting measurements from the 24-GHz nanoradar altimeter from the smoothed acquisition surface and applying a similar lowess smoothing.
- 110 6. Virtual profile extraction: Finally, two virtual down-slope centerlines (L1 and L2), each intersecting three boreholes, were extracted by sampling the 3D GPR data cube and the bed/surface models using a nearest-neighbour approach to retrieve the closest available values.

### 3 Mass balance and firn cover evolution

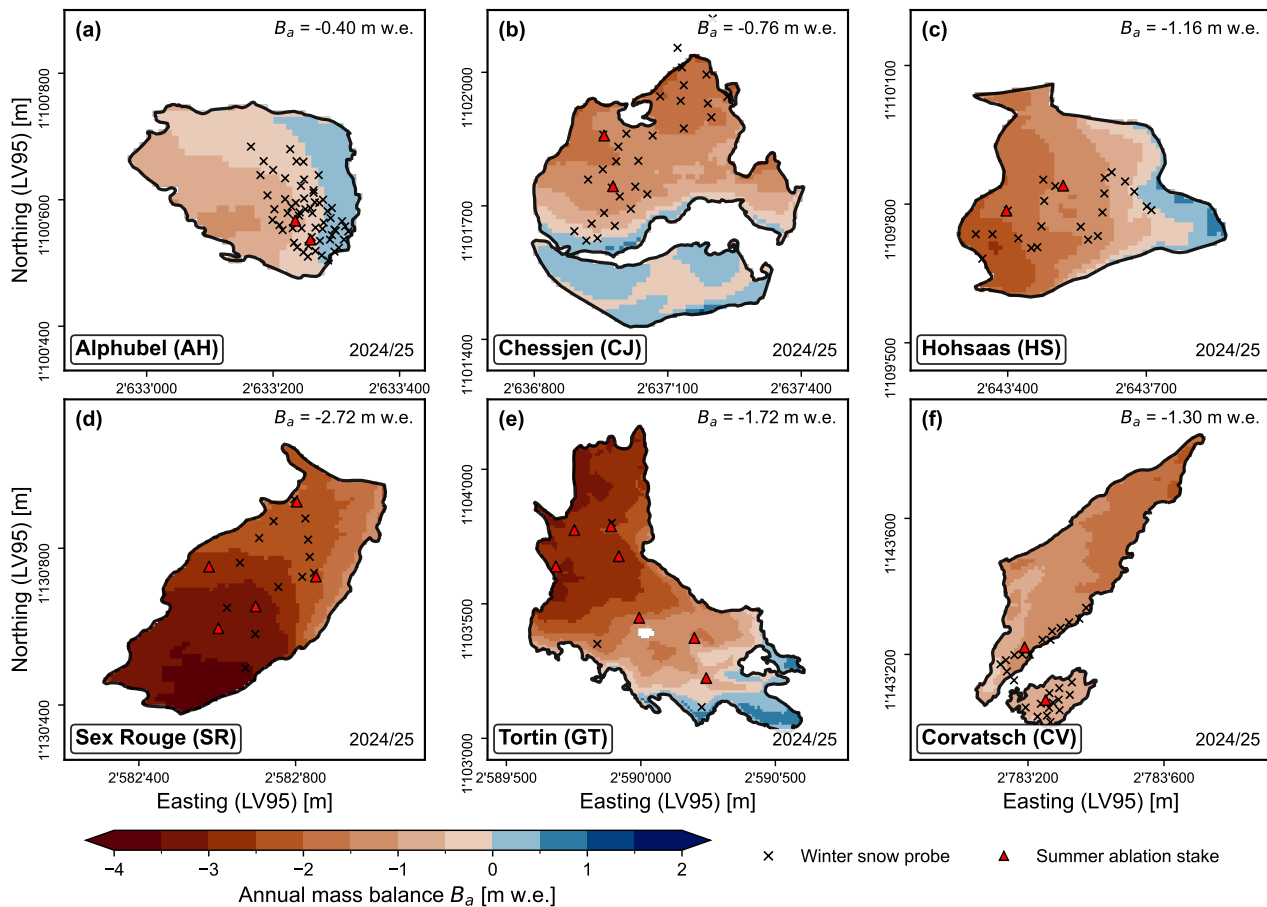

**Figure S8.** Spatially distributed annual mass balance for the 2024/25 hydrological year at all six study sites, derived from the mass balance model of Huss et al. (2021). Black crosses mark snow depth measurement locations from the April/May 2025 field survey, used to constrain the spatial interpolation of winter accumulation. Red triangles mark locations of summer ablation stake readings. Glacier-wide annual mass balance values ( $B_a$ ) are annotated in each panel.

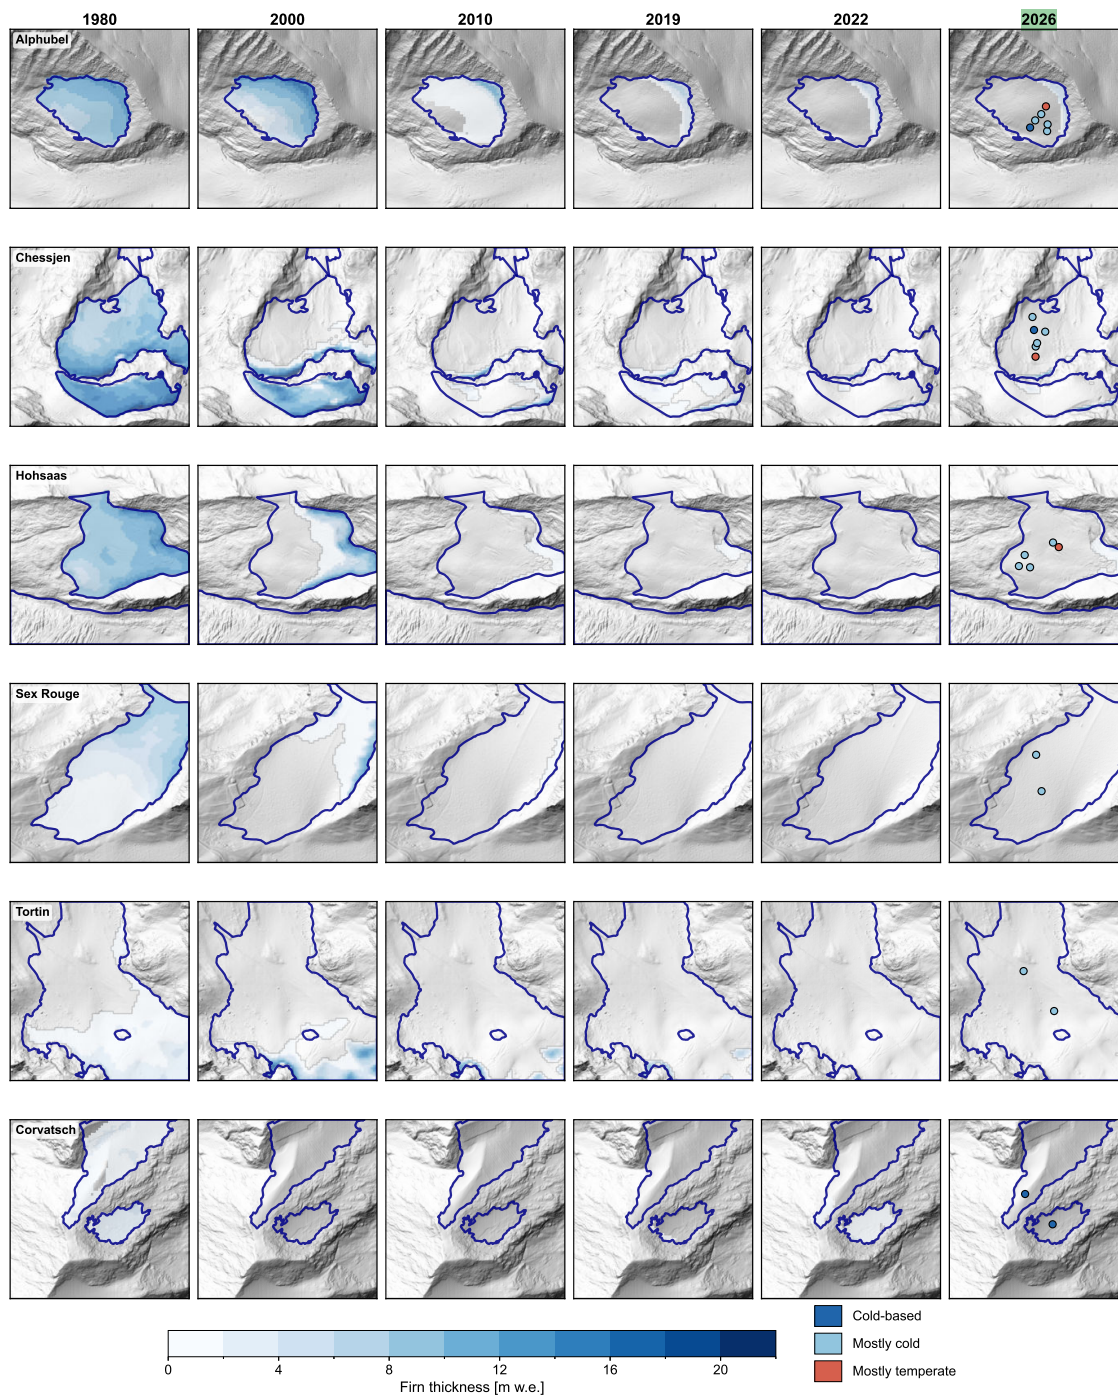

**Figure S9.** Modelled firn thickness (m w.e.) at the six study sites for selected years between 1980 and 2026. Glacier outlines follow the SGI2023. Borehole locations are indicated in the 2026 panel only and coloured by thermal regime (see Sect. 3.3.1 of the main text for category definitions).

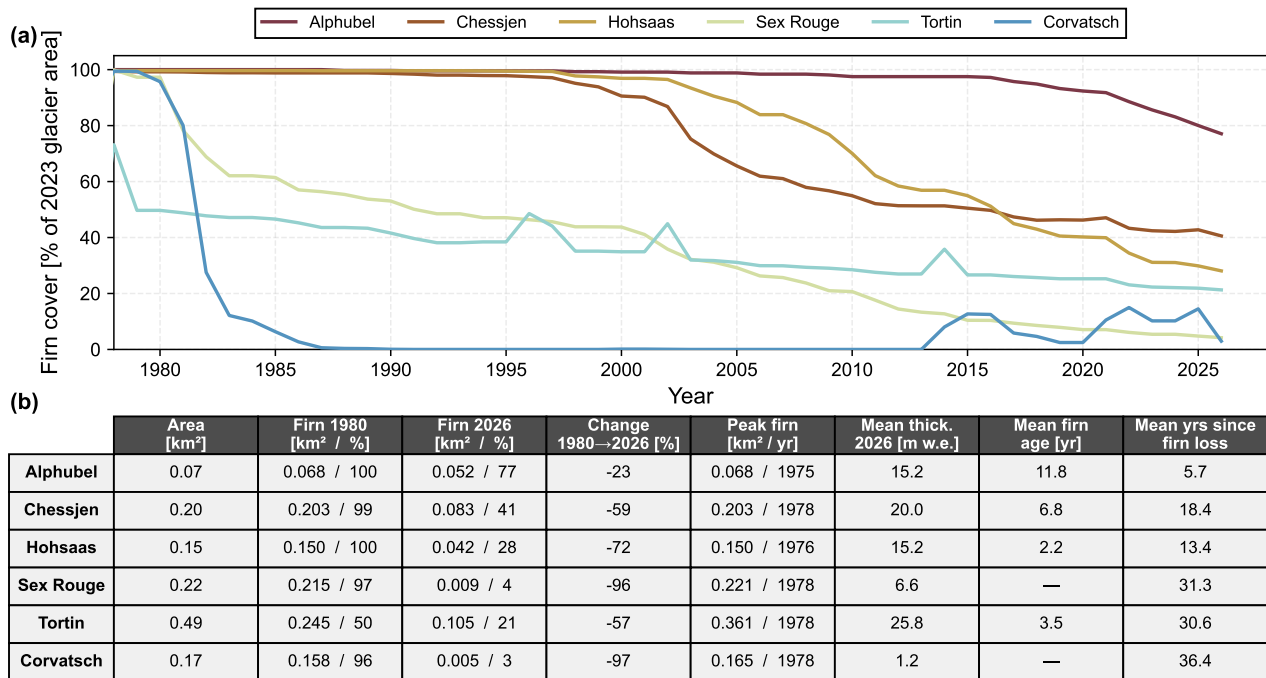

**Figure S10.** Firn cover evolution and summary statistics for all six study sites, derived from historical mass balance reconstruction. (a) Annual firn cover expressed as a percentage of the 2023 total glacier area from 1975 to 2026. (b) Key firn metrics per glacier: total glacier area, firn extent in 1980 and 2026 (km<sup>2</sup> and % of 2023 glacier area), relative change 1980–2026, peak firn extent with corresponding year, mean firn thickness in 2026, and mean years since firn loss for currently firn-free areas.

#### 4 Deep borehole temperature time series

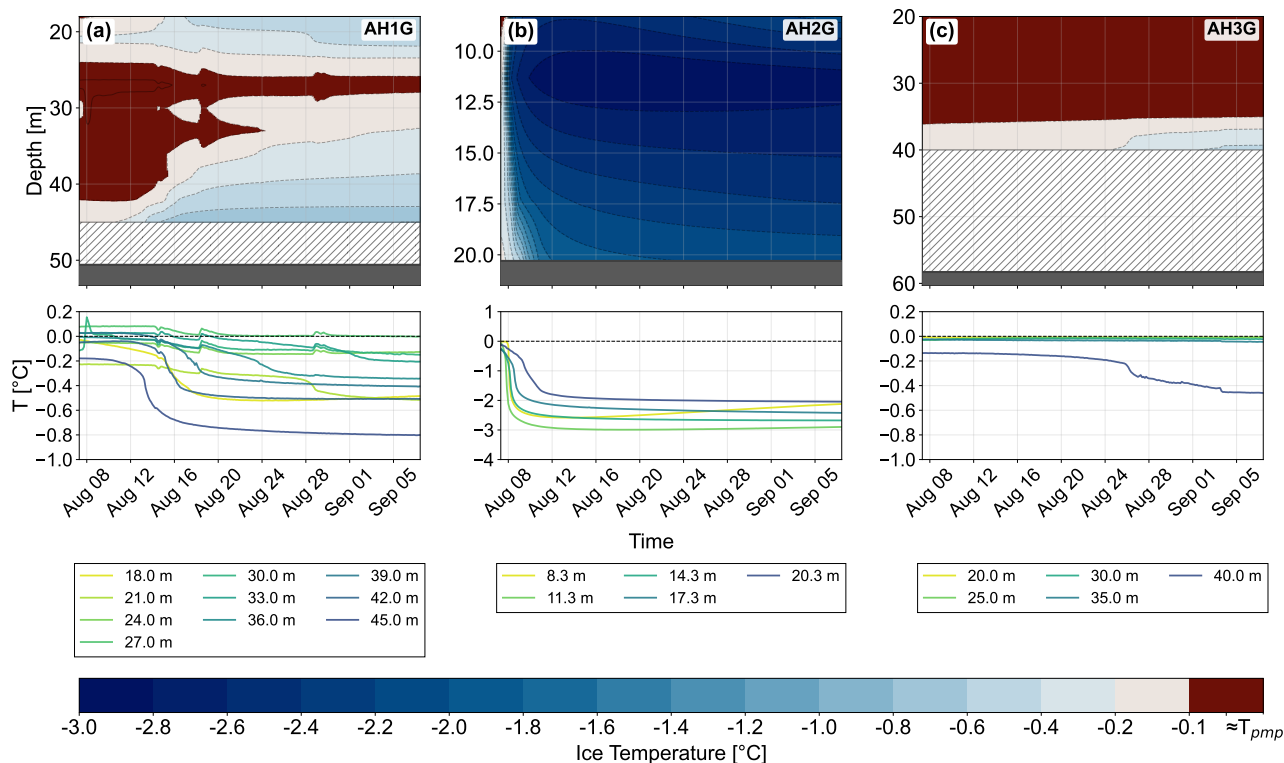

**Figure S11.** Ice-temperature evolution at the three deep thermistor chains on Alphubel South (August–September 2025) for boreholes (a) AH1G, (b) AH2G, and (c) AH3G. Top panels show interpolated ice temperature as a function of time and depth, obtained by one-dimensional interpolation between thermistors; depth increases downward. Dashed contours denote isotherms, including the pressure-dependent melting point  $T_{pmp}$ ; temperatures at or above  $T_{pmp}$  are classified as temperate and shown in red. Hatched areas indicate depths below the deepest thermistor without measurements, and the dark-gray band marks the measured bedrock depth. Bottom panels show the measured temperature time series at each sensor depth, with 0 °C indicated by a dashed line. The shared colorbar indicates temperature in °C.

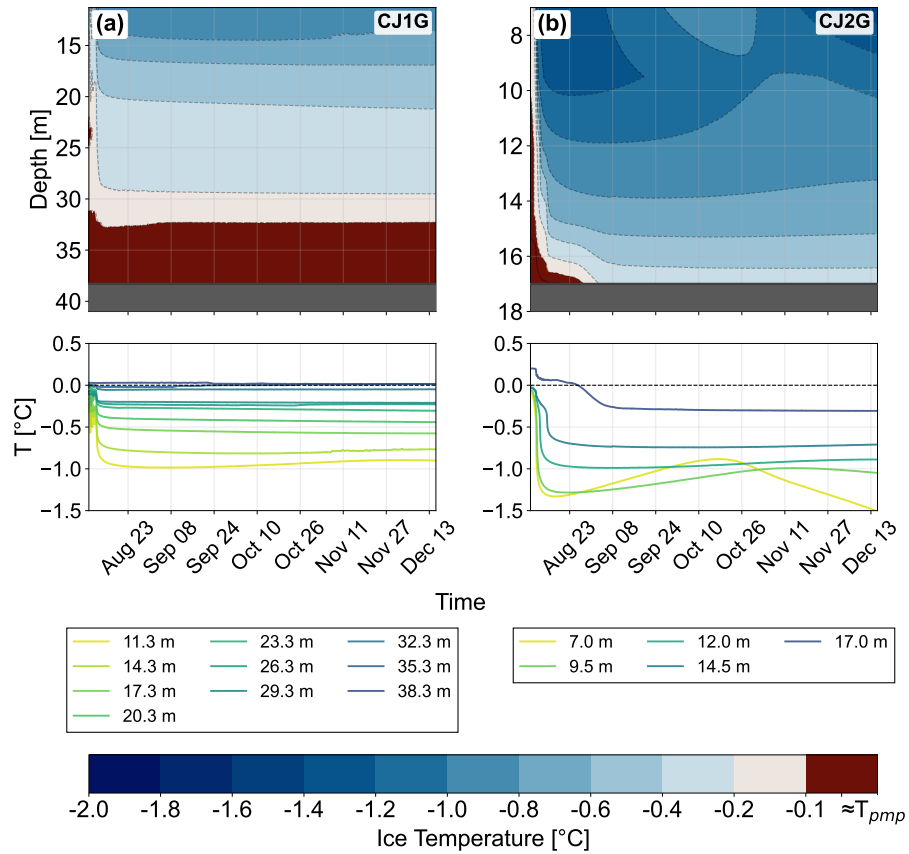

**Figure S12.** Same as Fig. S11 but for Chessjengletscher, boreholes (a) CJ1G and (b) CJ2G.

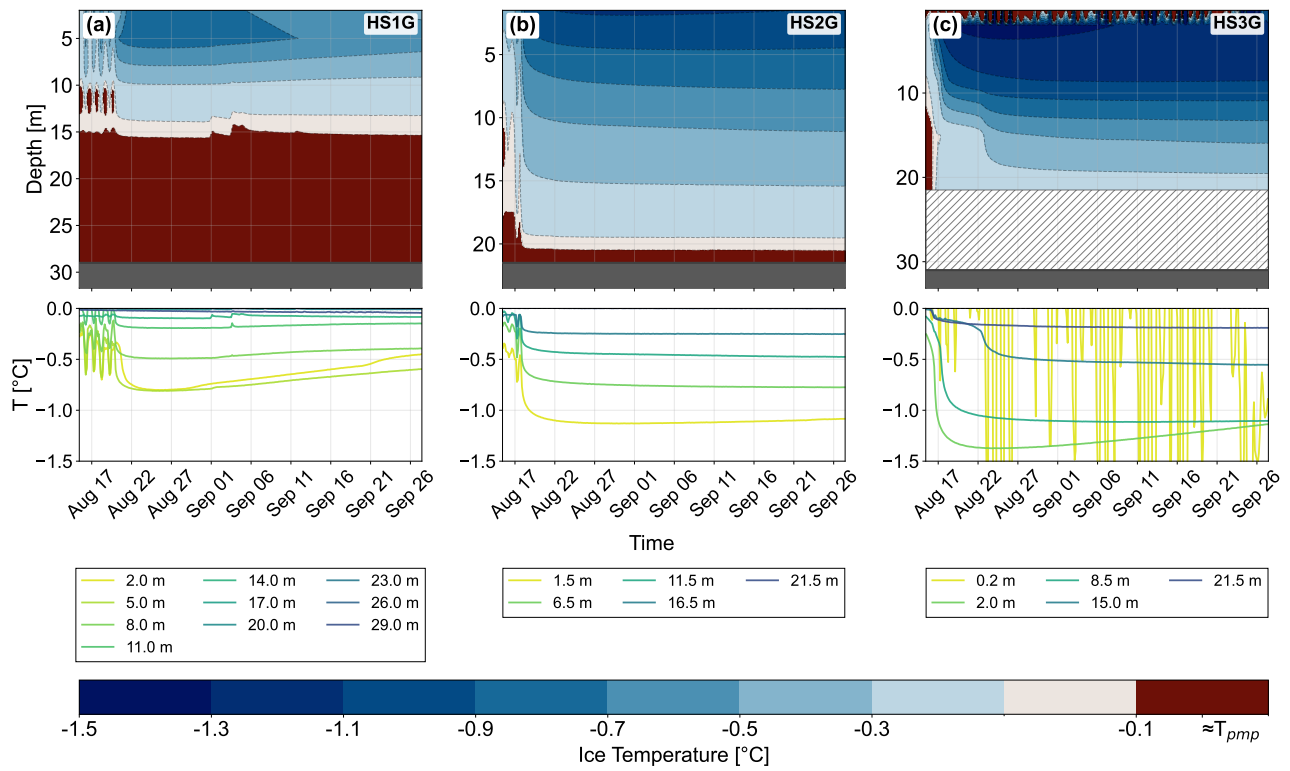

**Figure S13.** Same as Fig. S11 but for Hohnsaasgletscher, boreholes (a) HS1G, (b) HS2G, and (c) HS3G.

## 5 Displacement rates

115 Displacement rates were derived from repeated GNSS measurements at ablation stake locations, conducted between July and September in both 2024 and 2025. For some stakes, reliable displacement rates could not be derived due to stake loss or insufficient measurement intervals, and are therefore not reported.

**Table S14.** Surface displacement rates derived from GNSS measurements for the 2024/2025 hydrological year. Missing values indicate boreholes for which no reliable displacement rate could be derived.

| Glacier              | Borehole | Displacement rate [m a <sup>-1</sup> ] |
|----------------------|----------|----------------------------------------|
| Alphubel South       | AH1TT    | –                                      |
|                      | AH2TT    | 3.34                                   |
| Chessjengletscher    | CJ1TT    | 0.28                                   |
|                      | CJ2TT    | 1.43                                   |
| Hohsaasgletscher     | HL5TT    | –                                      |
|                      | HL6TT    | 3.36                                   |
| Glacier du Sex Rouge | SR1TT    | 5.27                                   |
|                      | SR2TT    | 5.53                                   |
| Glacier de Tortin    | GT1TT    | 1.73                                   |
|                      | GT2TT    | 1.96                                   |
| Vadret dal Corvatsch | CV1TT    | –                                      |
|                      | CV2TT    | –                                      |

## 6 Historical images Alphubel, Chessjen, Hohsaas

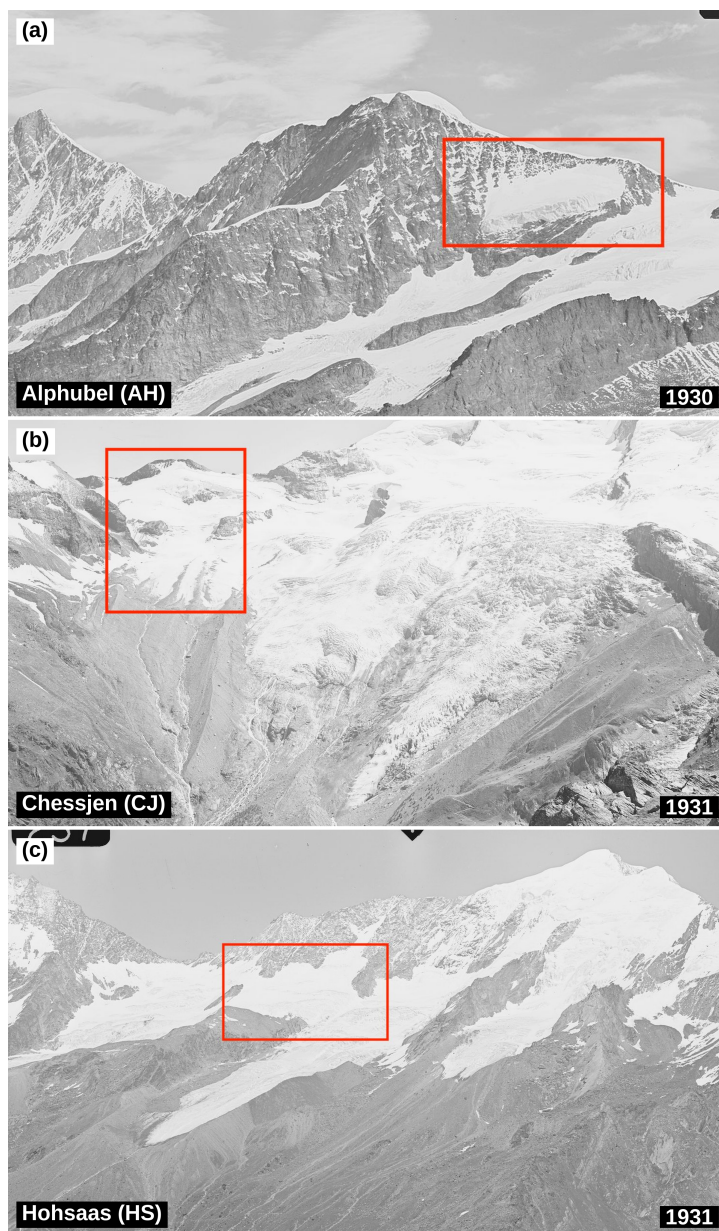

**Figure S15.** Historical photographs of (a) Alphubel on 1930-08-19, (b) Chessjen on 1931-07-16, and (c) Hohsaas on 1931-07-11, illustrating their substantially larger historical extents. Alphubel is expressed as a steep hanging glacier with a prominent calving front, in clear contrast to the valley-type glaciers of Chessjen and Hohsaas, which drain into Feegletscher and Triftgletscher, respectively. Red rectangles indicate the approximate glacier location. Photographs from the swisstopo terrestrial photography archive (Federal Office of Topography swisstopo, 1930–1931).

## References

- 120 Cuffey, K. M. and Paterson, W. S. B.: *The Physics of Glaciers*, Academic Press, ISBN 978-0-08-091912-6, 2010.
- Federal Office of Topography swisstopo: *Terrestrische Aufnahmen (Lubis)*, 1930–1931.
- Geolix Technologies Inc.: *Geolix: Cloud-hosted Platform for GPR Data Visualization and Interpretation*, 2020.
- Hardy, R. L.: *Multiquadric Equations of Topography and Other Irregular Surfaces*, <https://doi.org/10.1029/JB076i008p01905>, 1971.
- Heucke, E.: *A Light Portable Steam-Driven Ice Drill Suitable for Drilling Holes in Ice and Firn*, *Geografiska Annaler. Series A, Physical Geography*, 81, 603–609, 1999.
- 125 Huss, M., Bauder, A., Linsbauer, A., Gabbi, J., Kappenberger, G., Steinegger, U., and Farinotti, D.: *More than a Century of Direct Glacier Mass-Balance Observations on Claridenfirn, Switzerland*, *Journal of Glaciology*, 67, 697–713, <https://doi.org/10.1017/jog.2021.22>, 2021.
- Jacquemart, M. and Welty, E.: *Glenglat: A Database of Global Englacial Temperatures*, *Earth System Science Data Discussions*, pp. 1–47, <https://doi.org/10.5194/essd-2024-249>, 2024.
- 130 RGI Consortium: *Randolph Glacier Inventory - A Dataset of Global Glacier Outlines, Version 7*, <https://doi.org/10.5067/F6JMOVY5NAVZ>, 2023.
- Ruols, B., Baron, L., and Irving, J.: *Development of a Drone-Based Ground-Penetrating Radar System for Efficient and Safe 3D and 4D Surveying of Alpine Glaciers*, *Journal of Glaciology*, 69, 2087–2098, <https://doi.org/10.1017/jog.2023.83>, 2023.
- Swisstopo: *SWISSALTI3D – The Digital Elevation Model of Switzerland*, <https://www.swisstopo.admin.ch>, 2023.
- 135 Virtanen, P., Gommers, R., Oliphant, T. E., Haberland, M., Reddy, T., Cournapeau, D., Burovski, E., Peterson, P., Weckesser, W., Bright, J., van der Walt, S. J., Brett, M., Wilson, J., Millman, K. J., Mayorov, N., Nelson, A. R. J., Jones, E., Kern, R., Larson, E., Carey, C. J., Polat, İ., Feng, Y., Moore, E. W., VanderPlas, J., Laxalde, D., Perktold, J., Cimrman, R., Henriksen, I., Quintero, E. A., Harris, C. R., Archibald, A. M., Ribeiro, A. H., Pedregosa, F., and van Mulbregt, P.: *SciPy 1.0: Fundamental Algorithms for Scientific Computing in Python*, *Nature Methods*, 17, 261–272, <https://doi.org/10.1038/s41592-019-0686-2>, 2020.
